# Supplementary material for: Integration of Clinical Indicators and Multiple Machine Learning Algorithms for Prognostic Evaluation in Sepsis Patients with Different BMI: Model Construction and Validation
Source: Research Square preprint supplement (doi:10.21203/rs.3.rs-8038714/v1), 2025-11-18
Supplement: Supplementary file 1 [file 9fc1dfa9b9dc8deadf3a2a9f.xlsx]

## Sheet: Sheet1
age	gender	weight	height	ICU survival time	Did you die within 28 days	length of hospital stay	Starting with no revenue generation and pressure reduction	Initial non-invasive diastolic blood pressure	Initial heart rate	Initial respiratory rate	Initial blood oxygen	Initial body temperature	Sofa rating	P-S Index	GCS rating	apacheii	NMR	New indicators	PT	APTT	D-Dimer	complication	Infectious bacteria	underlying disease	site of infection	CRP	PCT	Mechanical ventilation and time	Platelet group
60	男	61.1	165	2.45	1	1.85	141	129	134	21	92	35.94	12	408	12	27	0.68	5682.97	12	31.4	0.7	1	1	1	1	105	0.5	23	1
74	女	51.93	159	12.54	1	12.66	101	84	88	24	86	36.94	4	348	14	19	2.42	2394.79	16.9	50	4.2	2	2	0	2	322	0.9	85	1
79	男	96.6	185	28	0	3.38	106	53	66	0	95	37.06	8	296	15	23	1.37	196.757	14.8	39.6	21.9	3	2	2	1	94.1	0.4	456	1
64	男	53	163	28	0	3.83	114	85	96	32	100	36.78	4	320	15	26	2.39	1002.41	16.6	49.5	15.3	0	3	0	3	202	3.7	240	1
45	男	72.7	158.454	28	0	5.34	133	73	89	23	100	36.44	7	350	10	22	1.43	430.83	16.3	46	22.3	2	3	0	4	298	3.4	6	1
64	男	67.4	152	3.92	1	3.46	144	81	98	19	97	36.39	7	350	6	28	0.89	1521.62	17	53.8	1.8	4	2	2	2	334.2	8.83	222	1
35	男	87.6	158.454	0.31	1	0.5	175	155	162	24	100	36.67	12	144	3	40	2.73	7184.41	12	32.1	16.2	2	4	0	5	189	12.4	23	1
59	男	69.5	157	28	0	5.27	129	72	90	30	99	36.78	10	120	8	25	2.47	25729.2	14.2	28.9	4.5	6	2	3	1	153	50	无	1
59	男	52	157	28	0	1.19	143	103	113	33	96	36.44	4	312	10	17	1.57	558.662	14.4	35.6	31.9	1	2	1	3	63	44.8	无	1
49	男	63.5	158.454	13.95	1	9.39	117	59	73	22	96	36.5	5	415	15	16	4	307.357	14.19	29.5	6.2	2	5	0	3	95.5	1.07	无	1
54	女	73.1	147	28	0	2.32	110	93	97	28	100	35.72	8	648	8	29	0.95	446.118	13.9	29	4	5	1	0	3	24.6	22.3	18	1
48	女	77.4	158.454	28	0	2.09	142	88	99	17	98	36.5	9	360	15	16	1.55	1686.38	37.9	180	2.8	4	2	0	3	166.9	4.4	105	1
49	男	51.2	155	16.82	1	16.86	142	67	83	25	87	37	9	27	15	16	0.55	25785.2	22.7	48.9	6.2	3	4	4	3	88	16.77	327	1
23	男	90.4	180	28	0	8.54	173	87	107	32	89	36.89	4	236	15	21	0.84	367.554	11.3	28	15.9	1	5	0	2	167	8.1	无	1
78	男	79.8	158.454	28	0	9.31	100	53	68	15	98	38.22	7	217	7	20	13.2	489.433	13	32.5	4.2	4	4	4	3	58	16.77	327	1
67	男	51	152	4.34	1	4.43	95	42	59	20	100	37.11	7	490	15	23	1.27	41.0536	18.9	41.9	31.2	5	5	4	1	167	1.5	无	1
74	女	50.4	140	28	0	2.89	137	63	79	21	93	36.72	6	384	15	27	1.01	677.714	12.1	26.8	11.3	4	6	4	3	98.5	4.7	41h	1
43	男	58.3	158.454	28	0	3.23	147	100	114	19	83	36.72	11	539	7	39	1.03	1722.63	13.9	35.6	4.2	8	6	0	3	56	2.7	843	1
54	男	45.9	158.454	0.25	1	0.44	92	57	69	29	92	36.89	2	76	15	18	7.04	9449.52	23	43.1	16.7	4	2	0	1	273.1	30	456	1
49	男	57	158.454	28	0	2.95	119	99	104	20	94	37.28	7	378	14	24	1.12	2201.12	14.4	31.8	7.3	3	2	3	6	91.3	35	238	1
34	女	58	158.454	2.71	1	2.02	132	56	79	14	97	36.56	6	210	14	22	2.48	4782.86	13.5	37.9	14.7	4	2	0	1	60.9	29.6	23	1
61	男	71.4	158.454	28	0	2.22	97	50	61	26	100	37.11	9	324	15	21	1.31	1716.48	15.2	31.5	4.7	5	5	1	3	107.7	0.1	1072	1
47	男	82	158.454	28	0	6.9	119	62	79	16	100	36.61	7	301	10	25	0.8	813.63	13.9	35.6	3.2	4	3	5	3	247	27.2	62	1
69	男	58.4	158.454	28	0	6.96	152	106	117	15	96	37.28	11	429	9	24	0.62	1365.35	23	43.1	16.7	0	3	0	3	64	36.8	240	1
76	男	45.4	158.454	6.51	1	6.62	85	47	59	27	88	37.72	3	138	15	23	0	0	14.4	31.8	3.3	4	4	3	3	146.9	7.9	648	1
58	女	50	158.454	8.24	1	1.74	114	18	31	23	87	36.5	5	245	5	28	7.86	1515.16	13.5	37.9	4.5	3	2	1	1	75.9	10.7	124	1
28	女	76	158.454	28	0	2.97	124	50	66	16	96	36.83	5	225	13	14	0.85	1067.34	15.2	31.5	4.7	4	6	1	3	46	4.8	227	1
62	男	79.3	158.454	28	0	3.57	142	60	80	17	100	36.61	11	528	7	26	2.01	794.877	14.2	32.1	9.5	5	1	0	3	196.5	5.9	无	1
18	男	55.1	152	16.55	1	14.52	99	71	78	22	96	37.17	7	609	15	20	0.91	2018.39	14.5	36.4	7.3	1	2	0	1	275.5	6.8	24	1
90	女	50.4	158.454	28	0	2.61	99	80	85	21	86	36.33	10	480	6	35	4.17	687.632	12.8	32.3	6.1	8	2	0	3	183.2	24.3	105	1
46	男	61.45	158.454	28	0	0.99	99	62	71	18	95	37.39	3	120	15	27	2.05	2390.38	13.7	37.4	3.9	1	5	1	1	36.7	3.5	229	1
79	男	48.5	158.454	0.37	1	1.37	94	55	65	20	94	36.67	11	957	7	28	2.56	10150.6	12.2	27.1	26.4	4	6	0	3	486.3	17.8	无	1
43	男	73.15	158.454	22.97	1	23.11	139	76	88	19	100	36.72	12	168	15	31	2.57	5012.99	12.8	28	4.4	8	2	0	1	308	15.6	无	1
72	女	53.7	158.454	28	0	2.88	92	50	64	28	100	37	5	235	14	16	8.56	782.887	16.3	37.3	23	5	1	3	3	56.4	1.7	无	1
55	女	64.8295	158.454	2.21	1	0.93	110	55	67	0	98	36.78	9	441	14	29	7.43	1647.44	15.7	28	5.3	6	1	0	3	102.5	27.6	无	1
63	男	72.3	158.454	2	1	2.16	136	91	102	23	100	36.44	2	174	15	16	1.25	630.429	14.1	32.7	2.9	1	2	3	7	110.2	0.6	无	1
63	男	77.5	158.454	4.24	1	1.16	110	69	83	34	65	36.67	8	696	12	25	4.16	1417.62	15.5	41	5.8	5	2	0	1	64	0.15	无	1
69	男	81.5	178	17.94	1	1.73	130	69	90	22	93	36.5	2	98	15	9	3.38	1003.02	12.9	29.1	6.2	3	2	0	1	128	1.5	32	1
80	男	87.3	178	28	0	3.14	164	62	92	29	92	36.28	3	531	14	21	0.96	472.71	14.1	31.5	9	1	2	3	8	129.44	2.3	241	0
58	女	72.2	158.454	28	0	43.46	113	81	92	22	100	36.67	4	1840	15	18	1.17	183.522	13.6	51.9	14.5	4	2	3	5	36.3	1.5	6	0
56	女	41.7	158.454	28	0	20	121	86	99	19	100	37.39	4	824	15	22	1.47	434.149	16.1	39.3	41.1	2	2	0	1	84	3.3	无	0
66	男	77.1	163	1.82	1	1.86	113	88	83	22	87	37.17	16	2512	3	47	33.76	83.67	35.9	9	26	7	4	0	4	142.7	0.5	43	0
54	男	43.1	168	28	0	7.63	150	76	96	18	93	37.17	6	1338	15	14	0.4	336.048	19	35.6	9	8	5	1	1	148	2.4	无	0
73	男	77.2	160	28	0	3.11	142	123	127	19	97	37.28	7	1071	15	25	6.21	200.436	13.6	51.9	14.5	8	4	0	3	142.19	15.96	无	0
55	男	72.1	157	28	0	6.1	132	41	63	26	100	37.17	7	1610	13	20	2.62	271.062	19.5	29.7	4.5	3	2	0	7	71.43	24.38	125	0
59	男	80	158.454	28	0	2.2	98	68	77	20	94	37.39	4	944	8	20	0.47	135.192	15.7	36.2	10.2	0	2	0	1	141.94	16.57	无	0
76	男	52	158.454	3.89	1	4.04	131	105	114	25	92	37.4	8	1176	15	18	2.32	513.036	7.9	35.6	7.9	4	2	0	1	122.44	19.82	26	0
37	女	71.6	158.454	2.26	1	2.35	116	81	89	23	92	36.11	4	660	10	28	2.51	615.919	15.1	17.8	2.9	7	2	3	1	6.01	14.88	无	0
58	女	91.8	183	5.56	1	4.13	129	82	79	24	97	36.83	5	565	14	12	1.85	328.678	25.4	31.7	5	5	2	1	1	106.76	23.86	234	0
61	男	43	158.454	28	0	2.8	119	96	101	17	95	36.78	1	225	15	17	0.64	212.379	20.2	38.2	9	5	4	0	7	259.28	16.28	无	0
54	男	54	158.454	23.89	1	4.82	140	53	78	22	100	38.44	9	2718	15	19	0.45	189.696	13.2	12	8.3	7	5	4	1	194.64	45.7	35	0
72	男	77	158.454	28	0	2.59	78	54	63	16	100	36.5	12	1212	6	31	0.99	329.073	16.5	37.8	11.2	6	3	4	3	130.21	2.33	无	0
60	男	45.7	158.454	28	0	6.13	94	73	78	24	99	36.39	3	855	13	18	1.39	51.3391	6.1	42.5	5.2	7	6	1	3	178.99	17.05	无	0
63	男	59.15	158.454	28	0	2.52	133	70	88	19	100	36.94	5	615	13	23	0.13	170.732	16.7	54.6	7	1	7	1	1	6.5	17.4	无	0
49	女	67.7	158.454	28	0	1.45	165	77	99	27	100	37	9	999	8	26	0.37	633.734	16.2	28.2	13.7	8	8	0	1	117	0.3	无	0
34	女	63.4	158.454	3.39	1	3.66	121	76	87	14	100	36.61	9	747	11	31	0.48	3974.14	8	55	5.8	3	5	1	1	194	1.3	125	1
61	男	55.2	158.454	21.9	1	22.06	134	91	101	18	100	36.72	12	6888	15	21	2.46	846.438	16.2	38.5	10.4	7	8	0	8	54.3	0.1	无	0
47	男	83	165	28	0	1.6	147	93	110	14	100	36.89	4	984	9	24	1.68	182.785	26.7	44.9	8.5	8	3	2	5	81.1	0.9	138	0
49	女	86.43	158.454	28	0	2.72	93	50	60	23	89	37.17	7	1932	12	20	1.25	180.435	9.5	28.7	6.8	2	8	1	3	162	5	256	0
49	男	54.9	152	28	0	12.57	108	44	63	18	96	37.17	6	750	15	20	2.52	1068	13.6	49.2	4.8	8	2	1	3	76.3	8.6	无	0
52	男	57.4	122	21.25	1	4.32	119	68	78	15	99	38.44	12	2352	15	18	3.36	401.633	23	32.5	9.6	2	1	1	3	12.6	4.4	143	0
94	女	64.8295	135	28	0	1.05	140	106	112	25	97	36.89	2	380	14	18	1.01	500.202	23.9	40.2	4.6	7	8	0	1	58	5.3	无	0
64	男	50.2	158.454	28	0	0.95	105	68	80	22	96	36.61	11	3476	15	25	6.3	802.401	16.2	27.9	12.8	1	3	1	8	117	2.5	241	0
43	男	48	137	28	0	7.86	99	39	50	25	99	39.28	15	2505	8	40	0.73	87.0259	18.9	48.7	1.9	2	1	1	1	159.6	12	56	0
57	女	49.6	158.454	0.43	1	0.51	83	60	68	25	97	36.33	9	1323	14	20	2.26	944.782	17.7	26.6	7.7	8	4	1	3	187.9	17.6	无	0
87	男	51.2	158.454	28	0	2.87	91	62	69	17	99	37.06	3	597	13	20	9.68	313.827	20.6	47.9	15.1	8	5	5	1	168.2	0.7	无	0
52	女	70.8	158.454	28	0	3.17	124	59	77	11	91	35.06	8	424	3	32	0.48	710.495	14.8	23.5	13.7	7	6	0	3	111.2	3	无	1
52	女	39.6	158.454	6.88	1	6.99	121	58	78	29	100	37.17	14	2310	8	28	1.2	582.061	15.6	39.4	15.3	2	6	0	3	189.8	41.9	87	0
57	男	65.8	157	28	0	2.08	95	75	79	20	97	36.78	3	339	15	23	0	0	13.8	25.8	5.2	7	5	4	3	192.3	3.3	456	0
65	男	63.6	158.454	28	0	0.72	118	86	94	16	95	36.67	3	693	14	20	15.84	157.586	11.4	29	11.9	1	6	0	3	173.6	2.5	75	0
52	男	50.7	152	28	0	2.87	139	57	73	21	96	36.56	6	780	9	19	1.11	182.461	20.1	33.6	6.5	5	3	4	3	108.3	14	无	0
52	男	51	152	28	0	0.98	98	28	46	14	100	36.11	5	1130	15	24	3.45	921.579	10.2	30	21.3	5	3	0	2	168.2	18.5	45	0
43	男	61.8	158.454	28	0	10.23	97	62	74	29	92	36.5	8	1720	15	38	31.86	0.408845	13.6	31.4	9.3	3	6	0	4	42.1	12.3	452	0
68	女	73.5	158.454	28	0	4.03	135	71	88	13	95	37	9	1980	7	19	0.27	100.572	5.4	56.2	6.2	2	6	1	1	108.3	2.8	57	0
72	男	70	158.454	28	0	0.41	153	65	92	22	95	36.5	9	1881	7	24	15.74	153.696	21.3	23.6	2.8	2	5	3	7	3.3	2.8	无	0
58	男	74.3	168	28	0	9.76	125	85	98	22	94	36.56	5	785	14	21	2.51	994.044	16.4	32.8	13	2	7	1	8	182.7	3.5	无	0
93	男	84	170	13.76	1	6.02	126	61	80	22	98	36.89	6	372	14	30	0.29	967.742	19.3	39.4	9.8	2	2	1	1	8.5	35.4	56	1
42	男	69.5	158.454	1.52	1	1.59	120	81	93	26	98	37.06	14	3556	9	21	0.94	123.36	15.7	11.8	25	2	7	0	7	96	16.4	98	0
36	女	46.8	142	3.61	1	3.8	95	57	67	21	98	36.72	8	1120	15	20	1.62	2718.7	13.4	43.8	3.6	4	8	4	1	164.3	1.2	76	0
47	男	60.05	158.454	28	0	4.71	130	90	103	29	93	37.17	6	1152	15	27	1.17	1457.26	11.4	47.7	8.6	3	2	0	1	56	0.8	无	0
36	男	72.1	158.454	28	0	9.32	157	79	100	11	93	37	3	753	14	15	1.2	291.048	17	14.2	10.1	7	1	0	3	123	0.4	279	0
75	男	46.1	158.454	14.68	1	4.42	108	68	78	17	100	36.44	9	378	13	22	0.29	1421.3	8.7	42	5	2	4	3	3	46.3	15.8	327	1
57	女	92	180	28	0	1.71	93	56	66	36	92	36.67	2	1022	15	16	2.44	68.2744	30	35.8	21.9	8	5	3	1	90	18	无	0
42	男	115	158.454	28	0	9.03	110	50	65	15	100	36.56	5	1290	15	24	6.83	44.1214	17.7	37.8	14.4	4	2	0	3	166.37	50	无	0
42	女	59.25	158.454	23.42	1	5.99	176	85	110	22	100	37.22	4	808	7	31	0.57	238.944	20	40.6	6.5	6	1	0	1	52.3	0.58	无	0
42	男	50.75	158.454	28	0	2.02	178	80	99	19	96	37.11	5	600	10	13	0.59	202.971	12.5	43.3	11.2	2	3	0	3	150.08	9.35	无	0
36	女	75.9	157	7.51	1	2.16	102	71	81	27	86	36.33	8	1376	15	22	0.89	327.423	17.6	37.3	12.8	4	2	0	3	66.17	5	无	0
65	男	73.4	158.454	28	0	3.39	120	58	72	31	94	37.17	7	1533	13	24	0.98	241.481	14.4	40	6.5	3	4	0	1	40.5	37.58	600h	0
48	男	82	158.454	8.56	1	3.49	122	67	85	11	100	36.44	6	936	15	17	8.68	878.543	13.8	83.3	1.3	7	3	0	3	18.9	4.8	无	0
68	男	70	158.454	28	0	4.01	155	62	81	17	98	36.39	2	408	14	13	1.37	276.677	13.3	35.8	2.7	4	2	0	3	100.18	6.01	无	0
55	男	63.4	165	28	0	11.11	99	46	59	19	100	36.44	4	816	14	25	2.8	3052.36	15.5	44.6	8.4	0	4	4	3	150.97	3.8	无	0
67	男	41	158.454	28	0	8.77	103	62	75	14	100	36.56	3	402	15	24	1.28	11160.3	17.4	63.9	6.5	4	2	3	1	22.65	5.9	无	0
45	男	46	158.454	28	0	3.12	135	95	103	19	100	36.33	3	681	15	18	3.34	158.873	9.8	31.8	10.7	8	5	3	1	6.5	17.4	无	0
69	女	67.9	158.454	28	0	4.56	142	115	125	15	96	36.5	5	1050	15	27	1.99	570.67	13.1	32.1	3.3	8	4	1	3	158	0.7	无	0
55	男	97	158.454	28	0	1.07	102	82	87	26	92	37.56	3	2664	12	21	1.57	106.78	16.4	26.8	3.2	7	3	0	3	58	3.4	无	0
74	女	70.93	157	28	0	1.1	111	81	90	19	94	36.61	3	507	14	18	2.72	30.7316	16.3	22.4	2.3	2	4	3	3	53	0.4	31	0
68	男	55.2	158.454	1.93	1	1.93	101	37	54	22	99	36.39	12	516	14	24	7.39	1391.34	13.1	24.7	11.2	4	8	1	3	23	0.3	32	1
47	男	50	158.454	4.61	1	3.95	124	69	82	22	94	37.28	7	1204	12	30	0.45	287.313	19.9	47.6	2.5	2	5	0	8	15.4	4.3	280	0
65	女	66.4	158.454	28	0	4.03	127	88	100	22	96	36.5	6	798	15	11	0.74	1119.58	16.1	29.2	3.2	7	6	3	5	202	0.6	105	0
48	男	46.85	158.454	28	0	1.95	114	82	86	20	92	36.11	5	630	15	13	0.81	738.916	14.7	36.8	27.6	8	2	3	1	295	0.7	27	0
65	男	38.8	158.454	28	0	1.68	129	67	80	22	98	37	4	836	14	19	0.79	182.862	12.9	38.7	12	2	4	1	9	95	2.5	398	0
72	男	73.4	158.454	28	0	7.81	157	75	101	20	100	37.44	5	745	7	20	0.86	186.085	12.7	42.8	10.2	8	3	0	6	169	1.8	108	0
47	女	63	158.454	28	0	2.19	145	62	81	13	97	37.22	4	448	14	12	1.46	260.074	14.8	26.5	14	1	4	3	1	117	0.3	无	0
52	女	63.9	165	28	0	3.77	98	69	75	22	99	36.28	9	1017	15	16	0.33	207.767	13.7	28.2	8.2	4	3	1	7	194	1.3	无	0
34	女	70.3	158.454	28	0	3.71	86	35	47	25	100	35.61	9	1161	14	25	0.46	240.145	12.2	24.3	5.7	0	4	0	1	54.3	0.1	12	0
68	女	83.6	158.454	9.59	1	9.7	133	59	82	24	100	37.44	8	1224	15	20	4.1	642.765	15.2	26	5.5	2	2	4	9	81.1	0.9	241	0
49	男	61	165	0.83	1	0.92	100	50	33	27	100	36.39	11	3047	8	28	3.87	430.158	23.2	34.3	28	7	5	3	6	203	1.2	6	0
67	男	55.7	158.454	3.82	1	3.92	96	56	67	20	85	36.39	11	8393	15	34	9.45	303.498	12.3	28.4	1.5	1	2	4	3	45.3	0.8	无	0
69	女	70.7	158.454	28	0	13.14	130	94	102	24	96	37.44	11	3234	15	14	1.69	243.284	14.8	29.5	2.2	5	8	3	7	224	3.2	20	0
23	男	60.07	152	28	0	4.28	145	66	81	19	100	36.89	2	318	15	12	0.75	324.321	11.9	28.6	0.9	4	4	1	1	70.4	6.5	43	0
51	女	97.3	165	28	0	0.7	117	54	67	26	96	36.06	5	1760	13	28	2.1	208.395	13.8	31.2	2.5	5	3	0	3	162	5	24	0
50	男	45.5	152	28	0	4.16	125	68	83	19	100	36.67	2	738	14	14	0.16	25.3775	10.8	32.7	4.3	4	3	0	1	152.3	5.4	1095	0
40	男	50.3	152	28	0	12.62	124	82	89	21	98	37.56	11	913	15	26	0.54	3570.63	12.9	29.9	4.2	3	5	0	3	89.3	1	无	1
78	男	53.1	135	19.59	1	6.14	60	43	49	23	92	36.78	10	2350	15	21	0.75	193.869	12.9	28.8	10.9	2	5	3	3	181	1.2	421	0
76	男	51.6	158.454	28	0	1.89	62	37	47	16	99	36.33	15	1155	3	48	4.33	641.008	13.5	30.2	1.5	8	3	0	3	165	8.8	无	1
48	男	79.95	158.454	21.99	1	3.73	103	57	70	19	97	36.78	5	520	13	16	5.95	953.526	12.7	26.5	2.6	4	4	0	1	256	6.5	296	0
64	男	54.4	158.454	1.31	1	1.36	91	45	60	17	92	37.06	6	2628	13	29	14.18	69.2257	15	30	1	3	2	0	3	126	6.6	35	0
80	女	53.2	147	28	0	2.4	169	68	91	27	100	36.89	4	400	14	25	0.18	170.746	14.5	44.7	6.9	4	8	4	3	76.3	8.6	无	0
58	男	95	158.454	28	0	3.51	66	35	43	16	94	36.89	8	872	15	20	2.17	2192.4	11.5	37.5	4.4	0	5	3	3	181	3.2	无	0
56	男	42.8	158.454	28	0	11.71	137	59	77	18	100	37.61	4	2040	15	20	9.28	88.8534	14	43.1	8	8	7	1	10	134.5	2	无	0
49	男	84.9	158.454	13.02	1	7.48	144	62	82	19	100	37.17	10	1260	5	25	1.32	139.683	11.6	28	0.8	2	6	1	7	133	53	12	0
66	女	50.2	158.454	28	0	13.78	103	53	67	28	98	37.11	7	560	14	21	1.47	182.775	13.38	45.34	8.09	5	7	0	1	86	8	无	1
75	男	56.7	158.454	5.4	1	2.55	105	60	71	21	92	36.78	1	567	15	16	2.5	126.726	12.1	15.9	13.61	8	7	3	3	88.8	32	无	0
60	男	48	158.454	28	0	1.86	134	84	98	18	100	36.56	5	905	12	14	3.06	661.152	13.29	32.84	4.13	0	7	3	1	12.6	4.4	125	0
54	男	60.1	158.454	28	0	3.35	107	18	39	26	100	36.56	7	749	8	35	1.24	111.254	11.17	38.26	4.5	4	2	1	1	200	50	无	0
69	男	68.7	150	3.65	1	3.79	107	85	92	25	90	36.89	4	716	15	14	1.38	153.631	17.05	39.71	8.91	1	5	0	1	22.5	0.6	无	0
71	男	60.9	158.454	28	0	5.16	110	52	71	18	91	37.39	8	2352	15	24	17.82	316.646	17.58	51.72	11.93	5	4	3	1	74.8	9.2	无	0
50	男	75.1	158.454	28	0	1.52	178	83	109	20	95	36.89	3	627	12	18	1.16	198.096	10.96	20.81	4.16	2	3	1	1	70	48.3	无	0
51	女	49.1	158.454	28	0	11.07	121	75	88	20	90	37	6	1452	15	15	4.95	283.05	14.01	41.59	11.24	1	8	1	3	19.7	2.9	无	0
73	女	68.6	158.454	1.09	1	1.27	104	45	58	14	99	36.83	10	1970	15	21	22.05	486.648	15.13	37.53	3.55	5	5	0	3	234	16.7	86	0
59	男	75	160	2.55	1	2.62	118	76	86	27	100	36.56	10	560	13	19	5.31	114.243	14.17	35.28	5.2	5	4	0	3	68.9	50	无	1
68	男	82	158.454	15.27	1	1.76	138	45	71	6	96	36.5	7	798	10	25	0.78	583.814	15.14	53.19	1.08	4	3	0	10	58	5.3	26	0
59	男	57.25	157	28	0	2.59	114	71	82	19	96	36.67	5	810	15	15	8.65	288.622	14.43	33.12	17.99	1	2	0	7	117	2.5	无	0
45	男	55.8	168	28	0	5.08	139	70	88	23	99	36.83	4	744	14	21	2.19	454.453	13.28	29.13	17.2	8	4	4	1	260	11.5	无	0
83	男	57	158.454	7.26	1	3.88	159	129	139	23	86	37	2	646	13	18	0.95	253.161	16.22	16.67	4.65	4	6	0	3	15.3	50	无	0
55	男	53.9	158.454	21.14	1	21.21	155	102	118	28	91	37.06	3	816	15	21	0.92	306.25	14.27	38.85	4.55	2	4	3	1	56	1.2	无	0
59	女	54.9	145	28	0	2.14	106	43	58	17	100	37.33	4	656	14	16	2	220.812	14.25	-2.26	4.58	4	8	0	1	242.2	13	257	0
81	男	82.93	158.454	1.07	1	1.17	70	48	52	27	97	37.39	15	1920	13	34	0.08	266.335	14.89	39.74	2.89	0	2	4	1	97.2	3.8	276	0
56	女	64.9	158.454	28	0	4.86	103	88	94	26	96	36.39	4	1244	13	19	1.69	386.429	11.03	40.69	16.98	4	7	3	1	48.6	3.7	453	0
54	男	78.9	180	20.97	1	8.16	87	63	70	21	99	36.33	6	1836	14	35	21.6	103.806	7.95	41.67	2.44	3	6	0	1	159.6	12	无	0
70	男	54.6	158.454	28	0	13.32	139	123	126	18	98	36.78	4	340	13	19	1.46	835.402	16.14	25.54	4.17	7	7	3	1	52.8	3.6	234	1
43	男	65.95	152	28	0	1.49	112	49	65	19	99	37.06	5	705	13	21	10.04	809.004	16.86	32.14	6.02	2	8	2	1	187.9	17.6	无	0
59	女	64	160	28	0	3.42	97	60	68	14	100	36.33	12	1968	9	23	12.59	0	15.15	20.69	19.06	1	3	1	1	67.8	9.5	无	0
76	男	82.1	158.454	28	0	0.96	133	55	78	20	97	36.5	3	393	14	14	2.69	90.3399	11.61	19.39	0.71	0	5	4	3	135.6	4.7	无	0
37	男	68.4	173	28	0	0.87	118	52	72	29	98	38.17	6	1086	8	27	1.68	367.531	12.94	13.36	0.53	2	7	3	3	168.2	0.7	无	0
55	男	55.5	158.454	28	0	3.15	118	55	66	20	96	37.11	10	1820	15	15	1.22	204.491	20.13	25.54	16。3	1	5	1	3	111.2	3	35	0
47	男	79	158.454	28	0	3.73	130	67	81	24	95	36.56	7	574	13	17	0.47	3988.44	12.37	28.65	2.3	0	2	0	3	189.8	41.9	无	1
54	男	76.8	158.454	28	0	5.35	140	77	91	25	97	37.11	7	917	13	11	0.48	427.563	12.85	36.54	4.2	0	4	0	8	46	7.1	无	0
41	男	50.3	165	28	0	1.16	116	64	78	14	100	36.44	4	1188	13	20	4.48	140.731	16.82	43.61	1	4	2	0	7	246.1	9	无	0
77	女	55	152	28	0	4.43	113	73	86	14	97	37.56	12	1908	9	32	1.77	265.09	16.59	47.31	9.47	4	3	0	1	122	3	65	0
81	女	60.4	152	28	0	1.54	94	48	59	19	100	36.5	5	1050	12	25	1.4	1253.82	11.24	29.26	8.41	6	1	3	10	192.3	3.3	78	0
39	男	62.7	158.454	10.22	1	2.33	116	78	86	16	99	36.44	8	512	15	25	1.38	1593.75	18.63	20.76	3.71	0	5	3	7	173.6	2.5	68	1
58	男	46.55	150	28	0	4.24	119	65	80	20	95	36.56	8	1224	15	18	0.16	583.851	15.33	43.98	10.4	5	4	4	1	106.2	4.5	54	0
58.2051	男	64.8295	158.454	21.8222	0.327267	4.73453	121.772	70.207	83.3849	20.5149	96.0336	36.8044	6.4783	969.562	12.6909	21.6088	3.3531	1393	12.39	46.32	16.2	3.92194	3.95102	1.40255	3.08996	125.561	11.7338	无	0.326151
47.6935	男	62.7579	158.454	27.746	-0.0429709	1.19527	146.183	64.7096	79.3503	12.0977	97.1129	37.144	4.0368	378.877	14.405	12.8564	1.91949	456.047	15.0811	25.6897	5.3	1.21752	3.6536	3.20306	1.22323	136.968	2.37901	56	-0.0389737
44.807	男	46.2125	158.454	29.5693	-0.0467977	3.94319	138.483	96.3817	101.234	18.4014	100.346	36.3823	2.59503	572.963	15.0415	17.9224	3.42375	271.389	9.59027	31.3061	16.7	7.92908	4.7595	2.91532	1.29	6.69527	18.953	无	0.0278498
78.9043	男	81.5478	158.454	28.5506	0.0096614	9.1728	105.313	53.8349	69.9783	15.3585	97.1079	38.2218	7.27723	213.037	7.11122	19.1374	13.5359	98.6593	12.7647	35.4474	1.5	3.51454	3.84283	3.71354	2.92134	50.3211	17.5883	76	0.993067
51.1264	女	59.8166	164.224	0.539946	1.00323	1.05714	99.054	50.7382	34.7269	27.3227	100.147	36.4428	10.5483	2905.48	8.39826	27.6874	3.85128	660.496	23.4825	36.0299	0.8	6.87686	4.90815	2.8833	5.85477	197.946	2.74291	无	0.0800939
51.6731	男	51.5341	150.763	28.6842	-0.0336425	0.958277	99.1495	26.9186	46.8926	13.7906	99.4402	36.1066	5.10399	1220.87	14.8162	23.0423	3.56614	878.504	10.5157	31.708	4.5	5.01115	2.94122	0.26544	1.82228	150.199	16.9383	无	0.0544803
33.6731	男	57.4302	158.454	2.38231	1.00824	1.81752	133.333	55.7471	80.9634	13.4561	96.8127	36.4381	5.74358	215.279	14.1674	21.2757	3.05853	4862	13.3264	38.576	6.5	4.31182	1.91259	-0.228874	1.14701	73.7187	27.431	456	0.992829
49.2048	男	63.0416	158.454	29.1516	-0.0254825	1.91802	145.457	65.2455	79.3894	12.451	97.2519	37.2127	3.88481	488.544	13.968	12.2503	1.77053	-100.807	14.0994	24.4582	3.2	0.855207	4.04289	2.99993	1.05183	129.721	0.52682	57	0.0335227
67.0715	男	52.052	158.454	28.3629	-0.0126627	13.9373	102.769	51.1672	67.6385	27.8005	98.0429	37.1613	7.15885	515.257	13.9463	20.2444	1.38594	241.997	13.2885	45.2642	5.2	5.1307	7.0069	0.00524093	0.982374	77.8996	8.09916	1095	0.981579
71.3445	男	70.2768	158.454	27.8947	0.078005	-0.314136	154.02	68.1399	91.7707	22.3444	94.5986	36.4568	9.16426	1845.76	6.77479	24.7162	16.4116	-2.91926	21.5752	25.3735	10.9	2.07397	4.85865	2.92126	7.29562	1.48223	2.0147	1095	0.00159071
65.7575	男	73.4673	158.454	28.4395	0.0624832	3.74825	114.077	57.3738	73.5512	31.4961	94.003	37.1512	7.42115	1560.6	13.4858	23.9542	-0.194386	-41.4282	15.1969	37.7006	0.7	3.01119	3.57458	-0.0680785	1.09243	41.2626	38.7724	无	-0.0169314
63.353	男	52.4301	158.454	-0.232028	0.939422	1.16135	92.5955	47.5773	59.7889	16.7347	91.2782	37.0515	5.97409	2516.28	12.8905	29.0551	15.1991	340.493	14.4712	31.1632	3.3	3.23729	1.80585	0.0110899	2.80857	118.34	3.91039	20	0.0359047
47.3498	男	47.9311	158.454	26.8939	0.0386765	1.41063	114.295	79.2645	85.2949	19.3836	92.5421	35.9698	5.09653	595.641	15.204	12.8208	-0.0371787	170.702	14.5117	41.0444	21.3	7.83148	1.8926	2.91371	0.844579	281	-0.0721076	无	0.0671284
52.3378	男	64.8351	164.619	26.828	0.0378218	3.55521	97.4796	70.1393	75.9908	22.1431	98.9032	36.3608	8.86211	934.497	14.4531	16.4975	0.0185859	416.464	13.5281	30.1404	7.7	3.85333	2.95168	0.781721	7.15567	192.322	0.599818	无	0.0374127
36.3288	女	65.8338	158.454	10.3603	0.946476	2.93003	120.788	76.5674	87.6049	15.5599	99.5272	36.3964	8.05733	426.526	15.3441	25.5041	1.35968	1846.68	19.2285	23.344	7.7	-0.00303474	4.7791	3.03301	7.23778	171.039	0.137497	456	1.04319
56.5918	男	74.5541	161.57	4.2507	1.03817	2.36449	116.421	73.248	84.7758	26.723	99.7518	36.5844	10.1384	357.505	13.3069	19.2157	5.23726	-210.804	14.1546	35.679	1.8	4.83676	3.90402	0.164757	3.12592	65.8018	52.1581	23	1.04324
76.215	男	55.3175	152.657	30.1903	0.071688	4.60109	112.057	73.4249	85.8881	14.7082	96.7532	37.5558	11.969	2036.54	9.02842	32.3635	2.26978	-38.0386	16.1895	49.0788	10.2	4.12954	2.77884	0.133475	1.43297	123.777	1.03758	125	0.0258236
58.5859	男	46.0613	158.454	28.6263	-0.0523255	5.78112	98.6586	74.9629	76.0613	24.442	98.6398	36.4508	2.43181	789.108	12.9338	17.8635	0.864679	-31.0734	6.34662	41.1882	6.2	6.81813	5.9754	0.875709	3.3732	190.393	16.2006	23	-0.0533699
74.4387	女	54.2152	161.559	13.0316	0.957232	13.0218	99.0537	82.357	83.4243	24.0844	86.413	36.9596	4.10441	459.657	14.1167	19.349	2.5495	2499	16.7214	51.4544	27.6	2.05771	1.79016	-0.192058	2.10067	319.582	2.21095	421	1.07968
63.7323	男	73.262	158.454	26.232	0.0474365	3.71719	118.713	55.0852	72.3672	30.3203	93.6656	37.1586	7.11484	1635.58	13.6675	23.7825	0.69286	184.998	13.8595	41.1958	12	2.97446	3.834	-0.0436215	0.80859	41.8596	38.5128	无	0.0845277
67.0282	男	81.9042	179.097	17.4073	1.01266	2.61233	129.656	68.8214	91.1153	22.113	93.3038	36.4568	1.78574	-25.4258	14.4857	9.00144	3.52657	1163.23	12.5059	29.6298	0.7	3.05481	1.74409	0.240649	0.700989	133.798	-0.0999898	无	0.989044
75.0463	女	69.4806	158.454	0.316683	1.02571	1.1862	105.967	44.83	58.48	14.5679	98.8197	36.8686	9.59541	1865.54	15.2281	20.8232	22.0178	1138.1	15.8954	39.9349	13	4.88276	4.96998	0.0990963	2.91158	238.42	17.6854	108	-0.0173654
33.6848	女	58.2703	158.454	2.10055	1.01588	2.33914	132.486	57.0662	75.429	13.7993	96.0687	36.4694	6.46491	455.748	13.7341	21.7057	2.52615	4595.25	13.6696	36.9154	4.3	3.91353	1.83057	0.108055	1.17192	55.9989	30.0184	无	1.02869
47.0943	女	82.3533	166.807	27.8349	0.0182116	1.64681	143.976	94.8465	109.357	14.722	99.7312	36.9212	4.15481	1152.05	8.99419	23.5564	1.40691	-451.009	26.7476	44.5582	2.3	8.02448	3.17732	2.13659	5.41694	81.8688	4.26845	35	0.0258028
59.0108	男	71.6812	158.454	27.5366	-0.0618312	2.83851	95.7552	49.8845	56.9367	26.6908	99.4443	37.0569	8.92784	320.975	14.9277	21.301	1.0567	2021.67	15.0897	31.6744	5.2	5.05153	5.07936	1.06459	3.09528	112.068	0.683212	234	0.99054
47.24	男	83.5553	158.454	6.61705	1.04882	3.14691	120.579	70.608	87.5089	11.8891	100.016	36.5005	5.64183	960.702	14.8751	17.8436	8.82266	1500.56	13.929	81.4185	4.2	6.99893	2.98634	0.0185128	3.26677	9.89947	4.59607	327	-0.0585575
58.1549	男	90.3129	184.268	6.29418	1.05452	4.48559	128.819	82.436	77.0107	24.1631	96.4389	36.8378	4.74112	504.454	13.9969	12.7538	2.31865	473.814	25.5237	32.1147	4.3	5.43487	1.84405	1.10166	0.944007	116.839	22.6234	56	0.0143206
47.393	女	86.6226	158.454	26.947	-0.0106926	2.62707	93.9961	49.3264	62.2995	23.3139	89.4364	37.2011	7.41032	1973.5	11.6692	19.1912	0.952895	-221.511	9.62897	25.5588	14	1.74736	8.07441	0.916166	3.14215	173.419	3.92546	无	0.0258321
78.5245	男	78.7858	158.454	28.2349	-0.0020266	9.27936	100.978	49.8663	69.7325	15.7557	97.9571	38.224	7.04336	148.167	7.30016	20.8298	12.7686	443.652	13.0507	34.4132	31.9	3.98363	4.13506	3.78289	3.18794	52.2346	15.5777	57	1.034
53.1614	男	55.7312	158.454	25.926	0.92863	4.86379	135.846	52.4893	76.3504	22.2391	99.9163	38.3553	8.82656	2522.94	14.4767	18.7952	0.754644	-223.622	13.5835	12.0852	10.9	6.59872	5.0279	4.11098	0.548148	196.185	47.6796	无	0.0163626
66.5928	男	53.4934	158.454	2.9175	1.02397	4.04039	98.4888	55.3459	64.9251	19.7321	85.3091	36.3484	11.1606	8266.16	15.1574	34.3867	9.43386	541.046	12.3102	27.4481	9.8	1.09488	2.3136	4.18999	2.90563	50.4233	0.825945	无	-0.0127004
48.1599	女	66.8903	158.454	25.5162	0.0266655	1.39452	165.591	78.8673	99.6418	26.7603	100.454	37.0325	8.74346	1001.02	7.90476	25.4167	0.782425	134.404	15.7683	26.6753	2.44	7.71561	8.08988	-0.171643	1.21677	112.648	1.11611	无	0.0465641
45.5861	男	48.5464	135.696	27.7192	-0.00289893	7.96248	102.239	39.8993	48.4535	25.1275	98.9905	39.2881	15.4728	2396.44	7.6585	40.0914	0.280181	-23.8778	18.6297	48.2713	22.3	1.92903	1.17865	1.12616	1.06265	163.442	14.1863	105	0.00308468
58.9812	男	77.2679	159.738	3.63074	1.05241	3.37322	119.039	73.7067	86.1877	26.3103	99.6365	36.6171	10.4261	553.543	13.059	19.2019	4.42633	-256.881	13.2964	36.5377	9	4.90512	4.02612	0.25799	2.72689	70.2022	46.5948	26	0.978221
52.5233	男	53.9048	158.454	25.8124	0.984428	5.29035	142.576	53.3349	77.1156	21.9234	99.1639	38.4595	8.85303	2614.86	14.5459	18.0444	0.18531	236.56	14.0947	13.0009	6.1	7.07163	5.13212	3.99966	0.445313	182.931	47.5464	296	-0.00846271
84.1484	男	56.1957	158.454	6.05303	1.02632	4.29484	160.091	130.306	135.737	23.586	85.6766	36.9533	1.80197	570.912	13.0116	18.3915	0.56943	117.79	16.6008	15.3807	11.24	3.85904	5.84419	-0.125559	2.91651	18.9626	50.08	227	-0.08179
32.2955	男	60.7251	158.454	3.19758	0.95247	1.80257	135.149	58.9712	74.9145	12.829	96.7091	36.5215	5.17528	291.884	13.585	22.8663	2.44087	4848.17	13.1336	36.3539	5.2	3.8482	1.91036	0.0188828	0.98366	52.1245	30.2281	105	0.991463
43.2916	男	59.7023	158.454	27.5432	-0.00109784	9.80557	98.2216	63.7257	74.4152	29.82	92.0505	36.505	7.53329	1743.75	15.1345	37.8876	31.5437	8.66783	13.4756	32.6004	10.4	3.36615	6.06832	-0.0845044	3.79824	49.5917	11.1039	1095	0.0322498
40.264	男	55.1147	158.454	27.896	-0.00812722	3.68596	146.771	101.479	112.971	19.5998	82.8373	36.6081	10.5781	538.072	6.73041	39.8755	1.39799	1358.04	13.6189	34.28	8.5	8.07257	6.0669	-0.0946652	3.03266	50.6459	1.60975	23	1.01592
66.1457	男	82.6374	158.454	17.8658	1.0105	2.17813	143.316	45.1168	69.9869	5.7543	96.3242	36.5809	7.04259	882.36	9.86847	24.8779	0.636905	815.458	15.8209	53.2995	4.2	3.85693	3.09926	0.0664917	10.1156	56.7135	6.0058	6	0.0712356
48.2748	男	81.2727	158.454	7.08463	0.982775	4.1929	124.08	67.7551	86.2746	11.2904	99.7111	36.4614	5.89723	982.127	15.0857	17.5469	8.75473	860.523	13.1732	83.5262	16。3	6.93604	3.21518	-0.246165	3.15309	29.8463	8.2429	125	-0.0123191
50.031	男	53.4206	151.706	28.2491	-0.00612836	12.2817	109.342	46.4297	65.1494	18.0017	95.9731	37.2293	5.57621	888.836	14.7747	18.572	2.59828	702.718	13.6505	49.7703	5.8	8.41957	1.72135	0.778364	2.46225	80.2595	10.0486	无	0.0228282
23.2393	男	91.4262	181.9	28.4591	0.0385047	8.43044	170.014	84.4084	106.501	32.6573	89.558	36.8136	3.91143	191.864	14.9831	22.5569	0.936815	1195.62	11.2521	29.5684	19.06	0.940032	4.80945	0.00296106	1.70001	158.389	9.92717	138	1.03714
58.8385	男	52.3532	157.58	29.0658	-0.020359	0.407486	139.986	102.321	112.376	33.5251	96.1611	36.5002	4.15918	270.765	9.55849	17.9626	1.55802	734.713	14.765	33.292	22.3	0.824233	2.04489	0.996576	2.93047	54.9043	44.5228	无	1.10975
67.5796	男	69.1829	158.454	28.0962	-0.0748878	3.82268	155.685	60.4977	81.9161	16.2518	97.9717	36.4979	2.16627	283.124	14.184	12.8168	1.62356	220.044	13.2541	32.3075	10.2	3.82532	1.85835	0.052734	3.1306	95.3995	5.14342	6	0.00678154
57.9358	男	43.8453	158.454	28.3024	0.0815538	6.60566	94.3404	73.7373	75.5145	24.3138	98.7163	36.3261	2.40159	813.828	13.5147	16.7306	0.994878	574.286	5.32389	41.463	15.3	6.85997	6.66051	1.28784	3.11167	182.138	15.9227	24	-0.048915
71.995	男	69.8639	158.454	0.705544	1.06439	1.04735	102.563	47.3922	58.4087	13.8901	98.7015	36.8673	9.9596	2062.6	15.8144	21.1854	22.745	1167.24	15.0192	40.8221	4.8	4.8484	5.10085	0.0160424	3.10771	236.858	15.995	27	0.0397212
41.3569	男	115.942	158.454	28.2642	-0.0602366	9.3357	110.33	48.8392	66.0109	15.0443	99.5991	36.5601	4.56424	1414.77	15.0266	23.0706	6.71254	-9.58815	17.2709	41.4953	9.3	3.67369	1.98468	0.0918166	2.91248	159.645	47.0362	31	0.0874001
68.4759	女	40.8563	158.454	27.6631	0.0321495	8.67907	106.716	57.3521	76.246	13.6109	99.745	36.4853	3.28405	494.167	15.2299	24.2863	0.628685	11288.7	17.4351	67.2463	8.6	3.71333	1.8992	2.85026	0.925216	13.3395	4.85336	456	-0.0151098
51.4797	男	99.9751	165.472	28.6102	-0.0234453	0.85467	118.627	53.1984	63.4525	26.9342	96.3562	36.0838	5.24701	1587.8	12.4807	28.2649	2.1934	-156.692	14.4331	30.8473	21.9	4.78852	2.90611	0.117875	2.83376	164.246	4.19096	43	0.0394005
56.5385	女	67.9498	156.23	27.6372	0.012282	4.72222	126.331	73.7762	88.6054	30.5558	98.8954	36.8203	9.71712	223.957	8.43828	24.394	2.0473	25674.8	13.4322	25.6433	3.3	6.15085	2.00589	2.9192	1.17534	151.549	49.7468	无	1.05756
55.4525	男	64.8295	158.454	2.58018	1.01371	0.97067	109.739	56.0454	65.3913	-0.395333	97.3638	36.7509	8.75869	264.545	14.2264	29.7215	7.7604	1573.88	15.3468	23.7183	16.7	5.90278	1.0219	0.0109628	2.78989	119.707	27.7902	23	1.04764
35.4624	男	71.0977	158.454	27.9713	-0.0109265	7.89235	155.117	79.8326	100.183	10.2868	93.8334	37.0564	2.8547	839.198	13.8589	15.5185	2.29729	359.345	16.756	13.0779	1.08	6.94717	0.910694	-0.0167077	3.19402	123.292	0.923309	27	0.00588179
60.0549	女	42.934	158.454	29.1054	-0.0365339	2.7108	118.093	95.4556	101.881	16.7939	95.1508	36.6994	0.290359	189.701	15.3608	17.6281	0.249389	335.341	20.0315	37.838	4.5	5.32388	3.94659	0.158557	7.04744	273.752	16.2585	1095	-0.03272
52.854	男	64.2525	165.025	27.9496	-0.0321884	2.99179	97.0325	66.5129	77.7415	22.2322	98.3369	36.2077	9.10583	1084.43	14.9258	16.0057	0.495056	414.636	14.0267	30.5768	2.5	4.33023	3.26287	0.798925	6.98972	184.664	0.460509	280	-0.00380754
69.4394	男	81.6505	158.454	13.5295	0.957293	2.33561	136.883	46.002	70.0934	6.12837	95.7917	36.5066	6.91405	670.116	9.86642	24.0889	-0.0917835	671.628	15.0634	54.7758	6.5	3.92806	3.27074	-0.350466	9.8501	45.4509	2.46529	无	0.0214832
75.3002	男	52.44	161.012	13.7787	0.961226	13.0311	98.064	82.3777	87.0886	24.6697	86.0523	36.9412	4.30561	460.405	14.1386	19.6294	2.64541	1947.39	17.0835	50.4156	15.3	1.83913	2.04928	-0.0327609	1.69059	313.065	0.0693657	57	1.04255
43.8283	男	53.987	168.285	27.1109	-0.0031314	5.30274	138.701	74.247	90.1058	23.4221	99.8034	36.7954	3.654	603.397	13.6899	20.826	1.75015	107.67	13.0038	27.5039	31.9	7.77957	3.73772	4.07192	0.85217	269.485	10.096	86	0.0156437
62.5683	女	61.2415	158.454	27.3582	-0.0333639	3.24597	131.689	71.1093	88.5432	19.5181	99.4777	36.9791	4.80497	550.844	13.298	22.1054	-0.180293	-31.1771	16.8015	52.8443	4.2	1.17666	7.1053	1.02337	0.924674	20.5079	18.0729	无	-0.0177968
68.4625	女	83.481	158.454	9.00528	1.03179	9.24709	126.147	57.8709	84.3219	24.1747	100.46	37.4657	7.52544	1128.21	14.692	20.8703	3.5531	538.471	15.5433	26.4644	11.24	1.9478	2.30394	4.18914	8.45926	74.8608	2.21284	456	0.0260168
65.362	女	54.6186	160.919	29.3492	0.0693254	4.664	118.802	83.8112	96.5289	31.2576	100.66	36.8215	3.68364	151.63	14.6937	27.3513	2.75359	1390.7	16.2767	50.7738	3.71	-0.0985572	3.26786	0.0671346	2.95495	198.326	5.05511	85	1.04029
62.331	男	59.6465	158.454	25.9035	-0.0270382	2.96493	135.547	69.8193	85.8805	18.8954	99.7037	36.934	4.62767	624.072	12.7347	22.9734	0.630227	-258.998	17.0449	55.3161	3.3	0.792513	7.14361	0.913452	1.21099	-2.82462	18.4929	6	0.0177828
54.7408	女	56.1617	158.454	31.0801	0.0111594	3.03709	117.12	54.5343	63.5581	20.5665	95.8692	37.1391	10.3137	1993.34	15.2215	16.3898	1.23161	72.419	20.1531	23.6494	0.53	0.803733	5.27815	0.643059	3.12947	96.7491	2.80721	54	-0.0391712
71.4554	女	78.0254	161.524	29.0367	0.0232919	3.65202	142.044	125.172	124.158	18.9725	96.5116	37.2585	6.78004	1326.96	14.8201	25.0588	5.78073	552.592	14.0615	53.089	9.6	8.08162	4.01044	-0.0364263	2.88674	147.921	15.2064	无	-0.00849797
21.3299	男	91.0486	180.796	28.2191	0.0220016	8.01197	170.259	87.3625	108.213	32.2689	88.9041	36.9893	4.03912	245.325	14.6069	20.7551	1.62936	256.744	11.2111	28.7783	1.9	0.66456	5.12282	0.157787	2.01071	168.779	7.02133	12	1.0444
56.1344	男	97.9311	158.454	27.9461	0.00354052	0.676465	105.967	80.5773	89.1771	25.8297	91.9828	37.5207	2.88006	2771.18	11.8234	20.5942	1.19735	276.913	16.5683	24.8435	3.3	7.25369	2.86688	-0.0601775	2.87305	58.0837	1.22346	229	-0.0647875
38.8935	女	73.5255	158.454	2.54031	1.03462	2.05952	120.438	84.676	92.3875	22.4497	92.3109	36.2118	3.60011	682.276	9.99065	29.0537	1.43634	564.356	15.0821	16.3667	4.5	6.86387	2.05715	3.00435	1.03396	-5.15784	16.312	327	-0.098055
77.8995	男	80.0847	158.454	28.5116	0.0224792	9.05752	100.367	53.0959	69.5443	14.9341	98.5138	38.2217	6.94698	264.881	6.65557	19.4978	13.4276	584.319	12.9575	33.7582	9	3.96184	4.25999	4.06468	3.35154	71.0815	16.5178	98	1.07065
59.4011	女	73.2271	158.454	28.6334	-0.0576915	42.9557	115.394	82.495	94.13	22.1652	99.6474	36.6035	4.18872	1807.16	14.6641	18.4733	0.621369	99.0964	13.7143	51.4715	4.13	3.65907	1.88474	2.84416	5.22106	32.2849	-0.299474	6	0.0239573
75.5049	男	45.97	158.454	15.2254	1.04051	5.00377	108.41	66.8173	76.9376	16.6496	99.0728	36.5061	8.61955	396.723	13.6158	21.6401	0.780943	1667.79	8.93696	44.904	7	1.99685	3.83155	3.09566	3.11887	50.5566	14.6067	无	1.02842
50.0993	女	99.3862	165.696	28.0879	0.0413595	0.576451	113.873	54.7061	64.8818	25.874	95.99	36.0661	5.25487	1811.59	12.749	27.7037	1.91073	-362.535	13.2484	32.1158	11.24	4.91628	3.01906	0.25129	2.8875	150.397	3.74826	无	-0.0504435
60.5046	男	44.7201	158.454	27.8063	-0.0355792	6.29825	93.0367	73.605	79.5571	23.498	99.1384	36.4311	2.73233	799.481	12.9058	18.6631	1.6898	-82.9121	6.73284	41.6107	4.4	6.98723	5.95568	0.973474	3.17118	177.47	17.1121	无	0.0345495
71.1473	男	61.0089	158.454	27.8515	0.00176841	6.68778	152.309	102.326	117.765	15.5981	96.1176	37.3392	10.8479	421.562	8.89289	23.7554	1.31598	1474.94	22.1791	43.0814	5.2	0.37529	3.12694	-0.173306	2.61496	66.3242	38.3412	18	1.01289
58.2051	男	64.8295	158.454	21.8222	0.327267	4.73453	121.772	70.207	83.3849	20.5149	96.0336	36.8044	6.4783	969.562	12.6909	21.6088	3.3531	1393	12.0877	46.4358	0.9	3.92194	3.95102	1.40255	3.08996	125.561	11.7338	20	0.326151
62.1845	女	45.9273	158.454	29.1129	-0.0097568	1.9889	133.489	86.5097	98.7095	18.7764	100.059	36.5314	4.79101	984.315	12.1812	14.7292	2.77896	1212.83	13.2484	31.5089	6.9	-0.20264	7.33604	2.65857	1.13323	13.8336	1.14778	无	0.0667206
52.3424	男	41.8856	158.454	28.5827	0.050015	19.0873	120.786	85.2277	99.592	19.817	100.714	37.4372	4.01184	721.686	15.2765	23.0282	1.43242	289.657	16.282	37.6323	8.3	1.81861	1.74781	0.0517131	1.169	87.9447	3.02686	无	0.00743353
79.1475	男	78.8134	158.454	25.1136	0.110188	9.27724	99.8108	50.8566	70.3516	14.9567	98.1799	38.22	6.90087	212.053	6.91077	20.415	13.9635	1036.13	13.6958	33.7817	21.9	4.15176	4.24516	4.06942	3.1529	48.9822	16.5445	无	0.981445
55.1215	男	73.3178	156.842	28.6439	-0.0366374	5.44691	132.122	41.6758	65.372	25.4611	99.824	37.2032	7.04075	1793.51	12.6394	19.5785	2.29305	27.5397	18.6797	31.2447	4.4	3.33117	1.85044	0.257202	7.0673	73.0044	24.0553	234	-0.0177069
56.5825	女	48.6546	158.454	0.62116	0.935625	1.45851	80.519	60.1686	68.9968	23.8853	96.7642	36.2259	8.25006	1434.72	14.3717	19.6713	1.96477	1435.74	17.4759	27.7034	1.5	8.07189	3.6488	0.970223	2.95532	188.807	16.6941	257	-0.0944031
48.1281	男	81.3536	158.454	8.54163	1.01416	3.92499	120.323	67.6916	86.5492	10.2133	99.9199	36.4616	5.42364	1065.49	14.9722	17.0514	8.91744	1180.61	12.8612	86.0691	13.7	7.17562	3.04652	0.0627006	3.1228	20.748	5.11394	43	0.0277949
49.2251	女	47.9627	152.766	27.6186	0.0336344	2.92048	135.995	57.3725	73.9416	20.2658	96.7714	36.5291	6.19403	782.345	9.50465	19.2066	0.823348	-155.081	20.114	32.61	5	5.15548	2.95021	3.8678	2.78251	108.877	14.0955	35	0.0122667
58.6933	男	51.3448	156.857	29.1035	-0.0107614	1.79316	145.287	103.984	112.155	33.7367	95.9136	36.5199	4.32672	342.808	9.34507	16.3641	1.64574	672.12	14.5199	38.6596	4.5	1.36187	1.78302	0.94529	2.8072	52.844	44.7641	6	0.990908
65.4986	男	69.8887	158.454	28.9301	0.0677412	2.98606	115.074	60.8143	73.3858	31.0619	93.9907	37.2001	6.71319	1629.19	13.057	24.4654	0.209507	222.548	15.1022	38.3536	2.3	2.50285	3.67121	-0.234109	1.01409	29.9883	38.1758	无	0.0598907
53.0634	男	46.8055	158.454	27.2413	-0.0623968	11.3294	123.698	76.1047	85.4457	20.2082	89.7727	37.0116	5.92313	1601.75	15.5596	15.055	6.04964	514.217	14.0633	39.7394	6.5	1.17014	7.99837	0.970101	3.03953	2.03743	2.2794	24	-0.0648269
54.2764	男	55.0016	158.454	21.5396	1.0323	21.3054	158.243	99.959	119.93	26.8134	91.518	37.0835	3.09284	628.692	14.897	19.8956	0.250728	223.747	14.7309	35.6338	5.2	2.25086	4.19082	2.95314	0.583295	62.5212	0.497464	125	-0.0279558
62.8712	女	51.3383	158.454	27.0462	-0.0282411	1.07601	104.293	70.6495	77.812	21.3598	96.9237	36.5617	11.2184	3349.75	14.9342	24.4021	6.14022	688.868	16.4577	27.0853	41.1	0.658622	3.11439	1.04593	8.10389	123.602	4.49263	32	-0.0398187
55.2995	男	65.5163	158.454	26.6457	0.0801458	5.46729	96.9108	91.1902	94.5235	26.4741	96.2124	36.4685	3.36127	1369.68	13.0862	18.6755	1.67387	892.337	10.8379	39.7695	2.9	3.77415	7.01109	2.90428	1.17638	55.3288	4.5076	280	-0.0130602
37.278	男	70.6992	158.454	27.3848	0.0928776	9.66961	156.155	85.1292	98.4519	11.1533	93.039	37.0963	2.72089	726.425	13.837	14.9531	2.14984	254.568	16.3781	15.1611	19.06	6.78305	1.09364	0.0127931	2.98236	125.447	1.59395	41h	0.00316064
55.459	女	53.8309	158.454	21.9866	0.964264	21.3478	154.85	99.8154	119.014	27.9213	91.0173	37.079	2.89524	751.531	14.909	22.2161	0.262082	611.63	14.3914	39.2957	1.08	1.81416	3.99468	2.94883	1.54198	38.9847	2.97026	85	0.020144
42.2604	男	73.1448	158.454	23.9056	0.974383	22.3201	136.636	76.4723	87.9379	19.3019	98.8762	36.7969	12.2215	47.6299	14.9015	31.1533	3.55511	4929.72	12.1414	25.8199	0.9	7.87716	1.72042	-0.0508836	0.844117	299.81	16.3594	20	0.983746
75.7166	男	55.0219	158.454	5.90366	1.04007	2.09178	103.795	55.9514	68.0789	21.8742	92.3512	36.7525	1.78702	513.731	14.817	15.4588	2.87601	742.592	12.6717	15.1823	7.7	8.06186	6.72215	3.01234	2.91758	90.1594	33.3404	68	-0.0410998
45.1355	女	74.8779	158.454	28.7118	-0.0180454	5.28143	136.579	74.0756	89.7706	22.8819	100.063	36.4015	6.92818	215.405	10.3584	22.142	1.63713	180.172	16.2285	45.3212	4.2	2.22075	2.96027	0.00622008	3.90982	299.081	1.11973	241	1.07898
57.3524	男	42.971	158.454	28.5067	-0.00211676	20.0446	122.555	84.934	97.9414	19.0371	100.202	37.392	3.5568	1024.7	15.1345	21.7734	0.981031	207.21	16.6276	36.0546	7.9	2.27574	1.96858	0.116837	0.98261	82.2232	3.59476	无	0.112973
61.0198	男	78.9799	158.454	27.3703	0.00118344	3.03056	139.837	63.7401	81.614	17.1029	99.6647	36.631	11.1267	525.847	7.0731	26.209	2.29363	1358.22	13.988	30.3074	7.7	4.78635	1.16641	-0.0185181	2.92497	199.443	5.63619	无	1.00671
82.5425	女	57.0389	158.454	7.68399	0.910518	5.03108	155.263	127.494	139.002	24.2783	85.8188	36.981	2.41612	640.438	13.2358	18.3737	0.590717	88.7438	16.3387	15.2614	10.7	3.7846	6.14809	-0.0537057	2.67889	15.3929	52.4223	41h	-0.0354514
51.4526	男	51.3019	151.348	28.7857	-0.000645022	1.70376	97.235	24.7154	46.7243	12.8781	99.8063	36.136	5.03402	1186.44	14.9229	24.7784	4.07902	1513.21	10.2924	32.6198	11.2	5.33554	3.11833	-0.0277531	1.87525	169.163	19.8393	无	0.0691177
45.9567	男	74.4423	158.454	28.7404	-0.0321505	2.37739	141.501	87.0836	97.246	17.3651	98.4815	36.5148	8.7144	452.363	14.7742	15.9844	1.06777	2015.94	37.8801	180.35	2.9	4.16492	1.94519	-0.109698	2.97772	161.802	3.48976	无	0.932227
43.4134	男	72.7919	158.454	24.1371	0.977014	23.1444	140.161	72.1587	86.9205	18.9386	99.8215	36.6717	12.3018	258.783	14.8242	32.055	2.51381	4955.84	12.609	29.2101	5.2	8.02113	1.73002	-0.0552447	1.28043	315.833	16.1382	无	0.984318
37.3645	女	70.612	158.454	2.9553	1.06729	2.24871	114.748	82.4605	88.1599	23.3029	92.9816	36.1351	4.20902	763.043	10.0005	28.5845	2.23425	-54.13	15.2732	15.0614	4.58	7.1207	2.08058	3.31177	1.50267	2.57386	15.1221	18	-0.0326096
81.0071	男	58.949	153.823	28.345	-0.0585699	1.08566	95.1965	43.9845	60.5692	18.6487	100.203	36.5417	4.67678	989.454	11.6911	24.5446	0.909596	1246.68	10.8312	31.4423	13.61	5.9924	1.1027	2.85991	10.3048	181.686	3.95597	327	-0.0543185
93.6725	男	64.8295	137.371	29.0505	0.0379061	1.08698	144.527	106.055	115.072	24.9738	96.3987	36.8983	2.12015	351.412	13.8541	19.4224	1.37814	537.757	23.3661	42.5776	5.8	7.13377	7.53293	-0.0427724	0.823016	51.85	3.82899	无	-0.0131177
61.0239	女	80.1042	158.454	4.21397	0.986997	1.28302	111.908	64.9597	81.5252	34.3802	64.9394	36.7257	8.31414	769.809	11.8495	25.2105	4.42591	1848.94	16.0486	37.3482	5.7	4.9143	1.83685	-0.0594777	0.841178	61.2204	0.669794	无	0.959518
64.4127	女	67.3284	158.454	27.1343	-0.0130405	3.43732	126.888	87.3772	101.972	23.6635	95.6928	36.4411	6.3723	747.383	15.6196	10.4625	1.34039	1706.54	16.421	27.9111	0.53	7.06855	5.86487	2.96206	4.96363	209.929	0.270594	18	0.000592799
51.5215	男	63.0726	166.21	27.8399	0.0368418	3.9295	97.5716	72.1955	71.0258	22.4318	97.9657	36.3026	8.97907	1016.51	14.191	17.0639	-0.553885	-45.3494	13.7291	29.106	16.7	3.61481	3.02314	0.949156	7.40733	193.663	1.7078	无	0.00127312
53.8799	男	64.8295	158.454	1.47878	1.01585	0.855896	109.166	55.7013	64.8126	-0.453206	98.7539	36.7234	8.8872	479.272	13.9476	30.3374	7.95847	1943.49	16.435	29.1776	6.1	5.82461	0.842905	0.042862	2.96224	101.015	26.5541	无	0.970894
64.7748	男	40.8272	158.454	27.3372	0.0265981	0.769417	131.762	65.3209	78.2438	21.7735	98.3314	36.9461	4.3866	911.359	14.5033	18.9787	2.03421	465.693	12.7818	37.4601	26.4	1.82736	3.99254	0.737496	8.69699	85.0398	1.65528	32	-0.0173567
59.5641	女	76.3395	159.348	2.40814	1.04513	2.20934	116.533	75.9393	83.5226	26.7577	100.251	36.5295	9.61879	389.384	13.0355	18.6758	5.08572	510.891	14.7539	34.7217	6.2	4.90453	3.95883	0.159201	2.8856	75.1656	51.6948	6	0.989186
62.6334	男	61.1864	164.033	1.67213	0.984557	1.65259	141.106	129.035	131.099	20.0404	92.078	35.8945	12.1382	476.599	12.2197	26.889	1.62113	5867.25	12.0775	30.3083	17.2	0.763737	0.968879	1.0971	1.1728	99.7996	-1.01823	无	1.03794
45.2437	男	71.7628	158.454	27.6977	-0.0285383	6.24098	133.12	73.919	89.7565	22.8236	99.3486	36.4135	6.56843	327.568	10.0291	22.4601	1.29931	-286.963	15.8477	46.2018	3.3	1.86394	2.85991	-0.190775	4.15748	297.202	1.98831	43	0.993047
43.3596	女	66.9615	151.799	26.1412	-0.0505824	1.75564	110.826	46.3422	64.6079	19.3916	98.7721	37.0496	5.3356	772.899	12.8054	21.8225	9.35846	751.572	17.6758	34.3277	14	1.61382	7.87505	1.65171	0.9543	199.707	17.5255	无	0.0386332
46.8961	女	63.57	158.454	28.2094	-0.0384751	1.55258	141.79	63.1522	81.695	12.3191	97.3968	37.2605	3.91871	522.567	13.3461	12.3672	1.30822	-166.984	15.2373	25.091	7.7	1.13992	3.78876	2.85002	1.15599	121.058	-0.81446	229	0.0274424
25.3211	男	77.2968	158.454	28.0012	0.137467	3.20198	124.755	44.7413	67.2647	16.5603	95.5045	36.8145	5.39961	379.322	13.0599	14.0655	1.37054	992.473	15.1466	33.3289	1.3	3.97896	6.07432	0.962752	2.48114	33.0119	3.52219	无	1.02677
58.963	女	55.8201	146.129	27.1979	0.0580186	1.40148	105.857	41.7752	58.4865	17.2607	98.8067	37.2533	4.1548	785.9	13.7738	16.9642	1.58376	582.944	14.571	-3.68844	7.3	3.56517	8.11168	0.396063	1.0237	228.085	13.1517	无	0.0650137
78.0841	男	81.3204	158.454	28.6471	-0.062978	9.82676	101.17	52.0506	69.2048	14.6076	97.893	38.2751	6.61468	346.239	6.76658	19.7986	12.9019	602.192	12.8218	30.951	14.5	3.78712	3.84931	4.08339	3.19646	57.487	14.597	85	0.947562
71.4391	女	69.2246	158.454	28.9204	-0.0616441	3.78514	153.752	63.2315	80.8726	16.9244	97.9332	36.3495	2.44876	546.559	13.8545	13.6636	1.66475	700.92	13.666	37.2959	3.3	4.08583	2.29736	-0.277456	2.8099	90.5063	4.5547	12	-0.0221663
65.7314	男	79.0084	161.651	0.241962	1.02246	1.81531	115.856	88.044	80.8258	22.8541	87.0639	37.1672	16.4886	2539.97	3.50889	46.8146	33.7615	209.955	34.8445	10.6848	5.5	6.86153	3.93848	-0.105859	3.8091	147.873	3.46572	无	0.0826018
60.421	男	48.2863	158.454	27.2513	0.0255098	2.49279	131.949	81.2669	99.9376	18.392	100.343	36.5816	5.27792	908.089	12.7014	14.2774	3.35032	181.394	12.8398	34.3959	3.2	-0.177722	7.29922	2.99183	0.573975	12.9371	5.06339	无	-0.012054
63.9515	女	53.2063	158.454	27.245	0.0255853	0.335646	109.005	66.0847	78.9209	22.0047	96.3005	36.6196	10.7601	3559.77	15.0633	24.9269	6.41811	-129.103	16.6323	25.4955	8.2	0.980979	2.87443	1.03894	8.3629	118.319	1.42211	138	-0.131875
72.3684	男	69.9316	154.794	27.0774	-0.0118843	0.433166	106.912	81.3863	88.2863	18.873	94.122	36.6629	2.9036	577.263	13.8644	17.964	2.95818	85.7195	16.1898	21.5485	4.2	2.08762	3.60371	2.79819	2.83562	47.3625	1.00382	85	-0.00950806
73.5956	男	79.5148	158.454	28.8142	-0.00584783	2.31145	79.017	53.8463	62.6741	16.0409	100.563	36.5232	12.0458	1182.34	5.65666	30.7571	0.775319	250.023	16.5916	39.3039	2.9	5.63373	3.07865	3.97928	3.05502	144.101	3.14912	无	0.00632125
75.0498	女	71.2167	156.856	27.8097	0.0152835	1.59561	112.112	79.8739	88.328	18.7265	93.2841	36.5684	2.77833	545.854	14.1367	18.8656	2.83508	-330.27	15.7055	22.4759	12.8	2.14028	4.0486	2.88985	3.13785	75.6745	1.83574	32	-0.122599
69.1044	女	81.0563	158.454	15.0103	1.004	1.03483	136.139	44.065	70.2354	4.87522	96.2378	36.6053	7.5331	794.632	10.52	24.5282	0.319467	-44.6027	15.9557	51.2279	4.6	3.79592	3.00673	-0.169422	10.3451	55.7778	5.11641	无	0.0624883
79.7304	男	59.699	152.746	26.0329	-0.103449	0.188233	94.9927	49.3537	59.6302	20.0913	100.295	36.5094	5.04546	968.042	11.9279	24.5235	2.03984	982.318	11.7655	30.0975	7	5.99543	0.874413	3.03985	9.96487	195.116	4.70987	456	-0.0334339
60.9585	男	63.5359	158.789	28.6237	-0.0107117	3.20467	99.993	58.9933	68.6381	14.083	99.4158	36.3229	11.1484	2091.85	8.30616	24.3652	12.275	-71.8686	15.0614	19.3838	2.3	0.990968	2.99324	1.11879	0.876873	68.5771	6.55688	无	0.0153915
16.0428	男	55.7145	154.192	15.3335	0.960313	14.7833	93.8144	70.8287	76.3555	22.2128	95.2917	37.2166	7.1069	614.298	15.1954	20.6294	1.47059	2264.45	14.3214	39.6793	4.5	0.865597	1.90002	0.129096	1.0395	273.429	5.2749	无	0.989414
63.8193	男	73.0574	158.454	2.05883	1.00817	2.73288	137.176	95.2194	101.107	22.9691	99.6484	36.4521	1.89033	370.628	15.2874	14.4648	1.13399	700.132	14.5545	35.5231	8.09	0.738964	1.94088	3.08817	7.2931	103.563	0.836599	无	0.939647
52.0582	男	50.3689	155.688	17.0923	1.13915	16.6389	136.168	64.2317	84.9678	24.6072	86.6882	37.0193	8.9764	-129.009	14.5375	15.6362	0.650313	26379.4	23.5751	50.0039	13.7	2.92715	4.16458	3.92366	2.96116	79.3455	17.2459	23	0.949852
50.6171	男	50.6647	151.732	29.3357	0.0171295	2.67363	136.741	53.3991	73.9092	20.9006	96.3551	36.6805	5.88388	726.562	9.05147	17.8337	0.864201	-200.216	20.521	36.0871	5.5	5.41446	3.03602	4.10968	2.78205	99.2417	12.6836	无	-0.043804
41.2094	女	53.8534	158.454	26.7152	-0.0146146	2.57075	181.811	81.5237	102.801	18.1453	95.7104	37.0967	5.25422	603.133	10.1316	12.3881	0.085457	528.541	13.4587	43.4184	1.8	1.65277	3.11927	0.0474384	2.64831	153.312	9.72455	无	0.0508583
62.1391	男	81.8026	158.454	25.0359	0.0429682	2.67759	140.639	58.6804	82.1616	18.2169	99.5964	36.5946	11.3527	637.162	6.97868	23.9798	1.14355	812.355	13.7929	33.4988	4.65	5.43154	0.954659	0.0205594	2.72123	192.355	4.9993	无	0.993089
86.2971	男	51.8321	158.454	28.1805	0.0224996	2.68456	88.2541	61.3812	71.096	16.3403	98.7117	37.0656	3.08916	635.34	12.7694	19.9118	9.15593	570.522	20.2383	50.6004	4.17	7.93377	4.93312	4.90611	1.1973	147.634	0.300125	无	-0.0244468
52.835	男	72.1551	159.228	29.7674	0.019582	6.19089	131.537	39.481	60.4579	25.4485	100.527	37.2218	6.89312	1639.8	13.2963	19.265	2.45915	109.761	18.9752	30.1486	5.7	3.00902	1.77444	-0.0762681	6.92682	74.9785	25.8596	648	-0.0437818
94.0957	女	64.8295	136.824	29.2162	0.0282873	1.26441	144.837	105.495	113.399	24.7647	97.0061	36.8172	1.98698	271.809	13.8824	18.0386	1.11522	896.21	24.095	39.7337	8.5	6.72289	7.92764	0.0113413	0.861331	57.6948	6.61233	无	0.0560337
43.5169	男	56.6888	167.422	28.2058	0.0958622	4.83667	134.715	73.1083	87.9027	23.6883	98.9155	36.735	4.00617	632.961	13.5668	19.9539	2.69175	563.545	13.3575	26.015	3.71	7.80332	3.35057	4.37451	0.836577	270.742	10.0604	12	0.0685906
62.6612	男	77.8183	158.454	27.5174	-0.0527144	3.58644	139.541	61.5597	78.9908	17.0078	99.9482	36.5816	10.7472	558.953	6.40226	26.0534	1.78864	543.808	14.1329	31.9481	4.3	4.87176	0.884584	0.0462393	3.01941	199.476	4.37353	无	1.0555
60.7163	男	78.9272	158.454	28.7923	0.0220775	2.38234	145.503	61.6766	80.3078	16.3394	100.609	36.531	11.1824	397.078	7.36773	25.7329	1.57202	790.434	14.5572	33.6047	5.8	4.73334	0.98399	-0.0938145	2.94534	184.705	5.30635	无	1.02307
69.1639	男	53.2828	158.454	2.86433	0.956818	3.60582	100.346	53.2462	68.7313	20.6703	84.6469	36.3695	11.1449	8341.95	15.1799	34.9668	8.73355	214.977	12.844	30.1281	2.8	0.946725	2.11022	3.87223	2.93766	27.5145	0.761384	6	0.0135771
71.9065	男	77.7783	160.382	28.4676	0.0258942	3.32646	141.758	120.762	127.917	19.3906	97.62	37.3043	7.48525	1119.08	15.0257	25.9085	6.4484	381.197	12.9265	52.8217	5.2	7.89621	3.94746	-0.0754839	3.30799	136.451	15.0101	86	-0.0569606
41.5504	女	115.938	158.454	28.4962	-0.042823	8.56116	107.102	44.4794	63.3909	15.2877	100.099	36.5169	5.39544	1195.72	14.8716	24.5055	7.51689	-391.83	17.4365	36.8108	4.17	4.47195	2.06799	0.334204	3.35106	161.384	51.5025	无	-0.0115154
91.1358	女	49.7	158.454	29.0407	-0.0194548	2.63815	103.903	78.4262	86.36	21.3825	85.9244	36.261	9.78401	634.077	5.84572	34.7898	4.79886	676.786	13.162	28.6875	10.9	7.70267	1.57375	-0.061284	2.63251	190.723	24.8016	无	0.967965
70.2815	男	72.2801	158.454	30.709	-0.0137551	0.623289	156.73	66.8603	90.8321	23.2795	96.1787	36.5034	9.2584	1998.47	6.68626	25.2779	16.0926	299.77	21.0935	22.695	4.5	2.02619	4.98889	3.1392	7.07477	3.22924	3.38631	35	-0.0855162
50.3176	男	73.3243	158.454	28.3852	0.045486	1.3565	179.588	84.0052	109.397	21.1677	94.5025	36.9317	2.70044	476.181	11.8742	17.0003	1.4771	210.299	10.6077	20.2538	10.4	2.0632	2.67158	0.942297	0.822678	79.0431	46.4714	86	0.0495172
68.825	女	38.8786	158.454	27.5004	0.0428121	8.85136	101.1	61.5693	74.4444	13.633	99.8333	36.4781	3.21922	312.514	14.3817	23.0966	2.12304	11658	17.8496	63.3282	8	3.72707	1.76372	3.04009	0.943336	12.0822	7.58534	68	-0.0325962
48.7557	男	49.4252	158.454	27.9749	-0.0580669	10.6105	120.885	74.9566	87.5991	20.8678	89.4191	37.0397	5.83726	1232.62	14.7853	14.9461	5.11491	569.068	13.4408	42.7204	14.4	1.17514	7.9634	1.12153	3.07059	27.3996	-1.17178	23	0.0560239
49.2578	男	86.4169	158.454	11.2834	1.00256	7.38139	143.625	60.6605	83.4035	19.2048	100.449	37.2095	9.67767	1184.89	4.90931	26.4509	1.64087	136.918	11.4669	31.6286	27.6	1.89843	6.24957	0.912216	6.95145	138.751	54.2042	23	0.0413054
28.3628	男	78.4394	158.454	27.318	-0.0330758	3.26125	124.774	50.3982	64.0947	16.2667	96.7962	36.8761	5.08822	298.555	13.1779	13.8698	0.690699	1147.41	15.3451	31.7257	0.71	3.36443	6.07259	0.901592	3.0526	29.9011	6.14897	43	1.02608
50.0915	男	84.2352	158.454	12.6182	0.941337	7.55492	147.394	63.4892	85.563	18.0957	100.787	37.2289	9.1575	1220.28	4.98836	24.882	0.64361	248.937	11.3467	27.6039	4.4	2.16826	6.00357	1.25463	7.15361	143.55	52.3757	6	0.0287106
46.273	男	81.5126	158.454	21.4755	0.989884	3.45005	105.057	53.8579	66.6643	18.9089	97.5769	36.8865	4.44843	564.226	13.2318	15.0719	5.6104	1102.55	13.0457	26.0263	27.6	3.71518	3.99618	0.15113	1.06724	256.745	8.33784	240	-0.0288244
77.1564	女	96.5442	184.46	28.1496	-0.0143794	3.48702	103.48	53.5827	64.9053	-0.434373	94.9069	37.0428	7.94409	149.892	15.3935	23.6089	1.36545	-477.861	14.5489	39.8273	21.9	2.73281	1.86045	2.12136	0.852357	97.2272	0.308899	279	1.08703
47.7287	女	62.7499	158.454	27.1927	0.113117	2.53108	148.22	63.8131	81.6781	13.4425	96.8279	37.2253	4.02597	524.587	14.3086	12.6135	1.49019	148.654	15.4218	24.9864	3.55	1.17542	3.89363	3.12084	0.856382	110.101	0.390139	124	0.00202021
59.4146	女	56.1801	145.554	29.1004	0.0201817	1.16158	106.732	42.1928	59.0703	17.5724	99.2123	37.3099	3.88366	602.723	14.1372	16.5079	2.95659	-327.719	14.1945	-2.04035	6.5	3.91147	8.08357	0.0705427	0.671381	252.372	13.4902	327	0.014144
94.3497	男	64.8295	133.82	28.0002	-0.0642152	1.60322	141.607	107.363	111.816	23.8914	97.9596	36.8901	1.50247	381.168	14.0035	17.595	1.05036	972.553	24.1963	41.0238	9.47	7.23403	7.7291	0.309719	0.805089	48.5408	9.9008	无	-0.030406
54.4837	男	51.7164	158.454	23.8809	0.973674	4.65951	143.431	58.4731	77.8949	21.9882	100.221	38.5141	8.74236	2709.09	14.7139	18.5451	1.03541	167.211	13.5293	12.3832	1.5	7.3086	5.11597	4.00674	1.44785	201.277	47.6411	43	-0.0436205
38.0506	女	64.839	158.454	9.89813	1.04761	2.53308	113.4	77.7971	86.752	16.5995	98.7681	36.375	8.12323	389.961	15.2158	24.1676	1.16394	1522.31	18.353	21.5961	2.9	-0.164458	4.92403	3.08861	6.81922	180.146	3.5123	无	1.02236
49.3243	女	88.4293	158.454	28.1523	0.0973491	3.29144	92.9162	50.7648	59.5768	22.9002	89.6259	37.1284	7.18326	1821.33	12.4899	20.054	1.09522	511.82	8.59355	29.4926	7.7	2.20228	8.16144	0.777292	2.72761	154.229	3.68209	无	0.0101894
80.4092	男	52.2938	146.882	28.8099	-0.0739278	1.74531	167.757	66.5649	93.5519	27.3896	99.5415	36.9566	3.99489	492.886	14.0998	24.3046	-0.479985	326.804	14.6592	41.462	5.2	3.80736	8.18794	3.87337	3.07303	92.1208	8.80732	无	-0.0369772
73.0027	女	71.5034	156.759	27.1488	-0.0876294	0.761389	107.332	81.3524	91.5374	19.1877	94.1917	36.6593	3.36441	545.294	14.5592	17.2421	2.35136	-386.322	16.3319	23.5638	5.8	2.56945	3.67283	2.81568	2.97481	54.8468	-0.773994	无	-0.0673831
42.6049	女	51.0157	150.962	27.354	0.0872118	12.4823	124.811	82.895	90.5987	21.1826	97.9186	37.5424	11.1252	1013.78	14.5551	25.7273	0.801699	3544.43	13.1454	28.6738	4.3	2.82329	4.88627	0.195563	2.95535	94.5159	2.18697	327	0.94051
94.6615	男	64.8295	134.023	27.7019	0.0181612	0.67592	145.875	106.379	110.23	24.855	97.301	36.9313	1.76455	411.16	13.6634	17.6851	1.01375	376.351	23.8	38.1975	10.7	7.26166	7.8327	-0.391803	1.32162	45.8186	5.50281	87	0.0560329
70.3368	男	76.2028	158.454	26.6788	-0.0404739	3.41807	73.6957	52.0172	62.8546	15.3499	99.97	36.5165	11.9116	1225.72	6.24942	30.6537	1.45826	-315.568	16.31	35.7817	16.7	6.21517	2.64553	3.93825	3.12534	147.103	0.706408	无	-0.0287279
48.9166	男	76.4271	158.454	27.1958	0.0249208	1.68107	141.924	88.4013	98.4496	16.4007	97.3161	36.5725	8.55809	194.343	15.0771	16.3002	1.64001	1431.31	38.7866	180.792	26	4.0806	1.79809	-0.45952	2.87903	157.132	4.51713	456	0.984124
78.6392	男	87.263	179.08	27.5325	-0.122861	2.87484	165.498	64.8432	90.1581	29.3791	92.0356	36.2836	2.96594	505.051	14.3832	21.0509	0.784972	404.888	13.4501	31.0933	6.1	0.82901	2.47738	2.8724	7.90311	137.615	1.07361	无	0.0679412
74.0989	男	70.2989	158.454	1.94833	1.00016	1.36755	104.288	45.8724	58.6597	14.0104	99.4944	36.8796	10.3503	1967.37	14.9955	20.8145	23.1168	444.171	15.454	34.4564	5.8	4.96139	5.11919	-0.0753583	2.88528	226.065	16.9183	无	-0.0525672
60.6176	女	75.7875	161.764	2.80774	1.01528	2.04622	117.735	77.8706	85.0152	26.926	99.9862	36.6877	10.2159	747.453	12.7469	19.1178	5.26337	-433.472	13.9164	36.1536	16.2	4.45083	4.37492	0.212571	3.19966	63.9625	48.7597	257	0.965944
38.8542	男	49.7631	151.68	28.19	0.0430832	12.4311	120.961	81.5391	90.2005	20.7735	98.3653	37.5889	11.4416	978.932	14.9377	25.3618	1.11755	3996.2	12.7518	27.2692	2.3	3.05723	5.16213	0.0608805	2.92966	95.5917	1.03969	57	0.963987
66.345	男	39.9179	158.454	28.8353	-0.047261	1.83152	129.545	68.4582	78.0397	21.8369	97.5072	37.0024	3.90459	983.426	13.553	19.0678	0.59076	145.132	12.76	38.9555	1.8	2.08915	3.85493	0.872117	8.5907	103.196	3.58353	无	0.0757985
40.5763	男	46.1735	151.117	27.8652	0.00399416	12.4611	122.23	82.543	92.1487	21.5595	97.9876	37.5949	11.424	970.35	14.6708	26.0969	0.892387	3584.51	12.5453	30.3358	6.5	3.03404	4.92535	0.16362	2.98897	79.1593	0.923403	24	1.09338
37.1477	男	73.7642	158.454	28.3833	-0.043137	9.27543	151.877	77.151	98.3582	10.8208	92.7057	36.9823	2.93911	684.732	14.2836	14.0325	1.66085	439.093	17.2522	15.8183	5.8	6.2418	1.11507	0.00273717	2.64917	131.698	-0.164367	无	0.035207
42.6482	女	47.7798	153.045	27.8987	0.0119043	12.3674	126.794	82.6194	89.4017	20.2833	98.3521	37.6754	11.4636	924.241	15.2546	26.6409	0.643537	3279.42	13.5139	33.1559	0.71	2.67726	5.08555	0.00576634	3.49856	97.6355	1.29349	54	1.0367
73.6574	男	51.405	159.871	12.8005	0.958265	11.9372	103.242	82.0717	89.4504	24.3974	86.0148	36.9487	3.99312	370.672	14.1059	18.4326	1.25076	2563.42	17.1075	47.5062	27.6	1.80923	1.8871	-0.184604	1.77958	314.518	1.9066	无	0.972813
71.9477	男	66.978	158.454	0.517943	0.980977	1.42349	104.121	43.7694	56.9548	13.8905	99.3252	36.8168	10.2228	1879.86	14.498	21.0581	22.0591	351.006	15.1756	37.4341	21.9	5.07437	4.70473	-0.151962	2.96305	246.752	15.1014	无	0.0912227
61.7581	女	57.2745	158.454	25.606	-0.0464182	3.35762	133.536	70.3681	89.5615	19.0168	100.513	36.8996	5.46467	578.108	12.8955	23.7495	0.741046	-160.575	16.2646	54.095	5.7	1.07378	7.64291	0.873351	1.05894	-5.12092	17.7763	241	0.0125402
34.861	男	77.5816	157.61	7.37819	1.03035	2.16878	104.513	71.578	78.7485	27.8591	86.326	36.383	7.93907	1356.25	14.6427	22.5958	1.15195	539.324	17.8281	38.0926	10.4	3.95659	1.9724	0.00713159	2.93411	61.1864	6.90227	75	0.039964
50.8924	男	48.4225	158.454	29.3966	0.0400152	11.1775	121.525	72.6875	90.6598	19.989	90.1287	37.0419	6.06879	1606.1	15.3431	15.0221	5.1714	834.254	14.9619	41.9841	15.3	1.16199	7.9363	1.01196	2.9338	23.5209	3.72825	无	-0.00494332
47.4763	男	79.502	158.454	28.9092	-0.0109364	4.06063	132.115	69.0495	81.0259	24.1545	94.5295	36.536	7.406	374.298	12.8298	16.7667	-0.385272	4256.28	12.202	28.0058	10.9	-0.261695	2.02216	0.237011	3.09628	182.991	41.9834	12	0.987444
69.3863	男	68.632	150.939	4.59767	1.00178	3.18416	106.304	86.1123	90.9076	24.37	89.9987	36.9179	3.9581	831.73	14.6833	14.6099	1.02222	494.69	16.884	38.9043	8.6	1.15561	4.95254	0.0591041	1.34837	24.6044	1.52366	无	0.0779053
74.1549	男	69.2911	158.454	2.30343	0.932476	2.0826	107.069	43.6297	57.452	13.8826	98.7487	36.7571	9.58391	1880.09	15.0087	21.4343	22.2543	294.264	14.8823	35.4898	5	5.12106	5.024	-0.415599	3.17519	235.923	17.3533	108	0.0252834
60.0182	男	45.8113	158.454	28.087	-0.0139689	6.22657	94.7504	70.0102	79.4817	24.3257	98.8378	36.3989	3.67506	723.313	12.8133	17.602	1.5938	-539.014	5.88396	44.3052	8.4	7.09628	6.25166	1.04031	3.33748	177.498	18.1381	无	0.0679897
54.0293	男	37.7414	158.454	7.07369	0.99766	7.76887	121.454	57.7182	76.9295	28.1688	99.8235	37.1919	13.852	2423.25	8.43274	27.4883	1.8032	1132.7	14.3882	40.2392	8.91	1.95358	5.97564	-0.222571	2.7611	196.44	38.9778	398	0.0119609
74.6305	女	58.1432	158.454	4.79369	1.12216	2.20013	102.029	59.1329	69.6274	21.1073	91.5381	36.8625	1.05001	637.245	14.7857	14.6661	2.42806	885.912	12.2788	17.5771	4.2	8.46684	6.77264	2.85173	3.07244	86.9784	29.7571	327	-0.0397418
40.7978	男	67.6847	172.958	27.6897	-0.0518324	1.73775	118.671	52.22	71.5942	29.0539	97.0775	38.1327	6.36415	1206.4	7.59191	27.0991	1.88153	937.63	12.5668	12.7928	7	2.12577	6.96839	2.87534	3.03544	170.047	2.15078	无	-0.0273267
69.8735	男	79.2451	176.091	18.5445	1.06825	2.09998	128.054	68.2939	87.8442	22.0221	92.6851	36.4382	1.80832	174.849	14.3721	8.94677	3.38813	878.941	12.1892	27.8997	6.5	2.75307	1.90919	-0.101819	1.08014	137.145	-0.673332	453	1.00482
67.8033	男	57.7798	158.454	29.1818	0.0464668	7.22396	150.507	102.097	120.335	15.5543	96.0911	37.2367	10.6825	626.697	8.99102	24.7313	0.129885	938.685	23.3325	41.1295	13	0.0633186	3.27844	-0.211079	3.31413	70.3071	37.3797	68	0.970652
55.5049	男	67.9741	156.132	27.8631	0.0130814	2.1917	93.0927	74.2449	77.9625	20.1787	96.3646	36.7154	3.07993	392.624	14.8361	23.2311	-1.12023	-393.792	13.3224	26.4559	2.7	7.19189	5.22901	4.03123	2.9496	198.57	2.79171	43	-0.0518791
48.6736	男	81.1817	158.454	21.5481	1.08198	3.61138	100.506	56.4057	71.5233	19.7899	97.0074	36.8446	4.43517	504.982	12.5833	16.8588	6.16404	331.352	12.5505	24.5999	1.5	3.85003	4.02103	-0.216551	0.907442	246.833	5.0617	无	0.0562804
46.688	男	49.4949	158.454	4.61052	1.01735	4.52301	128.97	70.2322	82.3837	21.469	94.8956	37.3549	6.90931	1236.91	12.3468	29.5511	0.536382	247.635	20.5473	50.9783	5	2.27777	4.74995	0.0547468	8.12188	19.5861	4.80483	327	-0.0255245
56.9969	女	64.3941	158.454	28.5902	0.01814	4.92699	106.114	86.6424	92.1966	26.0726	96.4822	36.4055	4.07719	1363.34	13.1946	19.7326	1.38301	979.76	10.4079	38.3004	4.7	4.09742	6.76028	3.34336	0.594117	41.5925	3.99025	105	0.00647364
76.6607	男	81.6341	158.454	26.5827	-0.00247613	0.0211318	137.492	58.2642	77.9891	20.0451	97.7746	36.559	2.91496	318.198	13.9918	13.6595	1.88592	37.9927	10.9335	19.8901	2.3	-0.597338	5.00296	3.79595	2.94594	125.379	7.74693	456	0.0138724
67.8983	男	58.2085	158.454	-0.324013	1.05703	1.39677	98.1394	33.2828	55.436	21.4286	99.1843	36.3965	11.5138	453.434	14.3979	24.5005	7.70273	1503.06	13.2189	27.5633	4.7	4.07642	8.06577	0.956329	2.96937	22.428	-0.602106	241	0.972448
58.8177	男	48.5533	158.454	27.4596	0.05111	1.7713	134.167	86.5496	97.6552	18.511	100.55	36.5554	5.50217	875.347	12.1932	13.061	2.92794	1169.46	13.7974	33.9348	2.9	-0.103539	6.92674	2.61266	0.789924	5.3867	6.47924	无	0.0679627
62.885	女	64.223	158.454	26.8017	-0.0291649	0.86796	114.974	85.5638	96.1854	17.2423	94.6588	36.6539	3.03262	491.009	13.76	20.1514	16.1165	8.2642	10.7051	29.321	17.2	1.13698	5.9061	-0.0461921	3.24128	179.907	3.00883	12	-0.0523325
44.3766	男	47.4925	158.454	27.5012	-0.0614944	3.09299	133.373	96.6715	104.871	18.9909	99.6963	36.315	3.45082	694.252	14.6969	16.7225	4.26569	911.043	9.97996	30.0302	11.2	8.24078	4.88408	3.09865	0.757539	12.9973	16.4456	12	0.0122558
80.1957	男	96.9459	184.566	27.8549	-0.00946159	3.96181	103.852	53.1552	67.6832	0.269883	93.709	36.9852	7.91809	114.976	15.2386	22.8281	0.306566	932.877	15.0565	37.0749	0.7	3.04977	1.99543	2.11061	0.968986	78.9233	1.55396	无	1.01153
54.2989	男	76.4247	158.454	27.5551	-0.0372924	4.41875	142.9	79.2159	90.1581	25.0452	97.5591	37.1228	6.72279	922.092	13.1156	11.2834	0.132578	379.115	11.941	37.9472	15.9	0.424644	3.53406	0.011875	8.06691	39.3929	7.91682	241	-0.00254156
45.2608	女	78.7156	158.454	29.4258	-0.00296109	3.79853	129.073	66.2468	79.0221	23.6187	95.726	36.5581	7.08479	657.048	13.0495	16.6647	0.366024	3775.03	12.7225	31.4023	8	-0.0455707	1.78464	0.136498	3.30893	178.156	41.9518	241	0.939246
68.2418	男	69.8963	158.454	28.3207	0.057681	3.14229	157.499	59.8637	79.8761	16.027	97.7393	36.426	1.93203	362.231	13.7531	12.3239	2.09247	534.321	13.687	34.998	6.1	4.15933	1.87738	0.390807	2.99759	96.4897	6.39448	234	0.0407935
47.538	女	78.9461	158.454	28.295	-0.0213163	4.09261	131.413	69.7622	81.3595	23.6228	94.8803	36.5645	6.629	734.964	13.1773	17.5446	-0.342637	3860.02	12.2324	26.5685	1	0.205263	2.23612	0.262831	3.21368	193.431	41.0381	无	1.03483
52.766	男	77.8541	158.454	28.6108	-0.00199614	5.30492	145.389	76.7793	91.9997	24.2561	96.6447	37.1021	7.46299	776.826	12.7797	10.9334	1.44135	0.192556	13.4028	32.0479	4.2	-0.0248235	3.84086	-0.0802045	8.15991	44.0673	5.90772	240	-0.031647
74.2146	男	71.0053	158.068	26.8821	0.00270463	1.30028	107.539	81.4308	86.0224	19.9107	94.1804	36.5679	2.80398	621.333	13.9703	17.6849	2.78747	504.176	16.8017	20.6077	17.2	2.19859	4.03529	2.77726	3.02818	48.2957	1.49649	无	0.0331423
72.0813	男	78.0613	158.454	29.02	0.0395481	2.17767	80.9456	56.401	62.9851	15.9385	100.53	36.5035	11.4203	1276.8	6.42201	31.027	0.942326	778.575	16.5455	37.5923	2.8	5.84836	3.0443	3.93766	2.75131	140.581	2.00667	456	0.0175626
48.4042	男	74.9831	158.454	27.9256	-0.104735	2.13068	180.682	80.9934	109.29	19.8151	94.1786	36.9257	3.41838	462.301	11.8073	19.6972	1.06164	255.561	10.7607	23.7323	27.6	1.89224	3.2538	0.854643	0.67255	51.6148	48.1844	222	-0.0599903
80.4995	男	87.4139	178.732	28.6582	-0.0282803	3.63721	161.723	63.1579	91.4916	29.4752	92.193	36.2247	2.84114	791.173	13.5412	21.7425	0.743352	6.0556	13.6706	32.7301	8.6	0.665312	2.24689	3.06928	8.02431	139.306	2.70401	12	-0.0400023
75.7829	男	43.2053	158.454	13.6278	1.00985	4.69852	110.356	66.853	80.3652	16.4005	99.8696	36.4442	8.80853	371.882	12.693	22.7483	0.810494	966.961	8.68342	42.5575	4.6	2.06156	3.98876	2.81869	2.87613	41.9584	16.183	无	1.05332
53.5121	女	65.2274	165.025	26.4748	0.0559396	3.70818	98.7863	68.743	75.7726	21.5902	99.0534	36.2913	8.44389	932.782	15.29	16.2804	-0.200627	247.391	13.9515	27.4688	4.17	4.08294	2.90702	0.988822	7.20983	193.377	-0.763671	125	0.0144946
52.4713	男	49.6019	158.454	28.8029	-0.0229292	11.3468	120.468	75.1405	90.3999	20.0364	90.2163	36.9653	6.54841	1316.95	15.0743	15.1072	5.12153	98.3377	13.8669	40.5243	23	1.30072	7.87019	1.12863	3.17025	15.4934	4.7571	453	-0.0264348
52.0766	男	74.5458	146.784	28.3695	-0.0874722	1.98261	108.073	90.0828	96.6044	28.5498	99.9113	35.6916	7.59381	626.883	7.96241	27.4577	0.759216	320.078	12.93	31.5687	6.2	5.20174	0.952861	-0.0154563	2.95786	36.9072	22.475	无	0.959785
79.6907	男	56.2044	153.625	27.1145	0.0288868	1.94835	92.3179	46.4856	60.7172	19.2681	99.9512	36.5111	5.01841	1037.77	11.8515	24.563	1.02152	1631.46	11.8	29.6268	11.2	5.92738	0.915126	2.85475	9.73575	182.481	3.00741	57	-0.0241436
66.7191	男	80.1253	162.236	0.966308	0.970384	2.64729	117.795	90.6272	85.9949	22.1327	86.8992	37.1152	16.2875	2521.85	3.14156	46.6907	35.0442	354.595	35.984	5.15769	8.3	6.69956	4.10826	0.180328	4.11658	142.794	1.12206	56	-0.0208217
65.7173	男	66.1978	158.454	29.1048	-0.0554542	4.54099	127.002	89.7232	102.403	22.0417	96.4573	36.5169	6.13284	769.419	14.7524	9.79318	0.9481	1628.83	15.9324	27.9692	15.3	7.11038	6.08219	2.71159	4.76765	206.207	0.941521	222	-0.0396292
35.7191	男	89.2054	158.454	-0.857569	0.970897	0.151766	176.83	154.878	160	24.2139	100.197	36.6267	11.9812	204.775	3.08915	39.255	3.03455	6818.35	12.3784	30.5317	21.9	2.28325	4.11573	-0.050315	4.82688	176.15	13.5075	无	0.918407
81.379	男	80.5935	158.454	29.6125	-0.00860133	1.1325	131.15	55.4728	77.5353	20.1078	97.104	36.5514	2.46397	355.797	13.7867	12.725	3.25502	-36.4764	12.283	18.3918	5.8	0.192574	5.24625	3.99361	2.77644	128.262	5.47674	无	0.053404
68.797	女	70.8877	158.454	27.1159	-0.0281891	3.39279	153.176	61.4278	80.3678	16.4496	97.401	36.503	1.74493	222.289	13.7382	12.9753	0.664158	557.136	12.0632	36.8287	4.55	4.27654	2.36428	0.0024419	2.96839	98.998	7.04643	27	0.0454694
51.5854	女	43.974	153.92	28.6267	-0.102809	4.4332	127.531	70.6379	83.8962	19.0246	99.8216	36.6284	2.05916	723.665	13.8141	14.527	1.03019	190.952	10.9917	32.5037	5.2	3.94597	3.02438	0.0277053	1.2671	145.227	7.35057	无	-0.0596457
50.3319	男	53.9964	152.382	27.6774	0.0418152	12.7851	104.843	43.6104	64.2572	17.4262	96.4236	37.1958	5.75204	522.778	14.8905	20.7124	1.27405	1634.25	12.9702	49.0595	2.44	7.88101	2.215	1.0937	2.99885	69.7943	9.87578	无	0.00638551
40.9094	男	53.0727	151.702	28.5921	0.0594261	11.7276	123.029	82.4508	87.4634	21.0433	98.0178	37.5249	11.0641	946.954	14.9858	26.267	0.158231	3726.03	13.1203	32.3003	5.2	2.81209	4.93123	-0.00543487	2.89883	86.5092	0.768289	125	0.957735
73.5598	男	51.6538	158.655	12.0059	1.03037	12.1055	101.08	86.2284	88.1243	23.7431	86.3109	36.9903	4.21475	254.01	14.0687	18.3799	2.19205	3077.7	16.9565	48.7273	6.2	1.98575	2.23172	-0.0564952	1.65177	327.182	-0.721252	无	0.987747
52.0596	男	49.415	158.454	27.8402	-0.0530312	10.9349	121.261	73.4884	84.3001	21.357	90.8326	36.9388	6.30319	1467.68	13.9243	13.7564	5.23888	482.598	14.2906	44.9967	2.9	0.979959	8.20758	0.937437	3.12602	16.9662	5.30798	843	-0.0161506
35.921	男	72.8604	158.454	2.30017	0.990608	2.2064	115.581	84.0311	91.6412	22.9787	92.4895	36.1332	3.61375	786.12	9.76445	26.8691	2.61862	1008.41	14.8796	16.5732	3.3	7.0527	2.19719	2.90614	0.821869	14.6123	14.5368	43	-0.0200419
53.6694	男	79.6181	179.908	19.9862	0.999696	7.58273	87.9259	60.024	69.0615	20.2496	99.0439	36.2878	6.69195	1744.94	13.8858	34.1832	21.5172	-15.7392	7.12311	41.833	14.4	2.96703	6.0184	0.120884	1.02682	151.641	11.3169	279	0.0938281
62.3224	女	77.7179	158.454	4.96722	1.02791	1.34566	111.621	72.1688	83.1023	33.9283	64.7592	36.66	8.24176	797.856	12.439	24.4279	4.15404	1422.9	15.3012	40.4861	6.5	4.96592	1.8693	-0.0992391	0.919148	54.0138	-2.3575	41h	0.979373
59.1143	男	52.5287	160.774	27.4962	0.0311535	1.31003	144.718	102.275	112.433	33.2775	94.7965	36.3902	3.99946	270.405	9.68501	16.8972	1.08431	895.275	14.5796	35.8255	5.2	0.801941	1.7273	1.12998	3.19132	78.3659	45.2887	无	0.962137
68.2316	男	69.8817	158.454	27.7756	-0.0342222	3.93728	124.694	87.5281	102.099	22.8942	95.9206	36.5398	6.34321	966.266	15.0475	10.3472	-0.00352509	1715.61	16.5482	30.0125	8.2	7.24012	5.99217	3.00292	4.96411	196.752	0.814963	无	-0.0357232
44.393	男	78.9165	158.454	27.0239	0.00382208	3.36927	129.335	63.3249	75.8026	23.685	94.8463	36.5195	7.74512	538.954	13.436	17.2182	0.830785	4257.91	11.8527	29.4428	6.9	0.0195123	2.29978	-0.0800102	2.98655	179.343	39.7125	222	1.0489
37.9581	男	71.8913	158.454	-0.255278	1.02132	2.85054	118.795	80.1157	88.9696	22.1544	92.184	36.1367	3.5468	579.332	9.61707	27.8505	2.85449	585.186	15.5534	16.4237	6.5	6.95552	1.93941	3.09492	1.11087	-7.88585	15.5344	无	-0.0773928
56.7484	男	76.522	161.357	2.36248	1.06786	3.41011	120.093	73.9781	85.8062	27.4365	99.9275	36.5434	9.92904	625.959	13.1149	19.0068	6.09686	623.196	13.884	33.228	4.2	4.8094	4.15353	-0.111661	3.48092	77.4758	49.2807	453	0.964275
53.3411	男	78.4015	158.454	30.3683	0.0328393	5.1192	136.789	75.8184	90.1691	24.2622	96.849	37.1045	6.25078	875.174	12.766	11.734	0.0876778	-382.418	13.01	41.1143	6.8	-0.339641	4.16503	0.0979582	8.20279	43.2775	10.9843	18	0.0677765
40.5203	男	64.4196	158.454	10.9902	1.03678	2.03782	116.822	77.733	89.1619	15.7669	98.1613	36.4471	8.06069	431.241	14.8528	24.2403	1.72405	1068.21	18.4049	19.8756	3.55	0.333534	4.94453	3.03265	6.97978	171.576	1.67795	无	1.01143
63.0897	女	60.0753	158.454	27.9811	0.00390743	2.75445	128.373	71.8624	86.3747	18.8623	99.557	36.9032	5.1151	569.139	12.7658	23.2695	-0.0108887	422.61	16.7804	55.8777	10.2	1.14143	7.25741	0.908467	1.00073	5.23009	16.7717	600h	0.00899059
54.4953	男	41.1442	158.454	27.7419	0.0657461	11.5391	137.11	59.4037	78.4137	17.9628	100.225	37.6202	3.98766	2035.72	14.7866	19.991	9.87119	94.0668	14.3937	40.1622	0.8	7.5859	6.43122	1.08114	9.8802	142.58	0.736992	无	0.0998805
38.0013	男	65.0663	158.454	10.2421	1.0191	2.26347	120.439	78.5983	86.6525	16.3683	99.8087	36.514	7.79382	640.818	15.7939	24.7853	1.88751	1817.5	18.0884	20.249	2.5	0.194603	4.76089	3.0839	6.78316	172.168	4.34501	无	1.01154
48.9488	男	78.2894	158.454	22.5271	0.959862	4.08303	100.783	54.8698	72.3107	18.6347	96.954	36.7424	4.35439	334.373	13.2463	16.5698	6.05489	977.326	12.3999	26.2676	2.3	4.23524	3.82095	0.177674	0.873832	274.698	5.96178	18	-0.033175
70.9803	男	70.4384	158.454	26.8409	0.0654156	-0.501322	151.048	63.2874	90.7779	21.8537	95.1545	36.5566	9.11766	1883.22	7.32133	24.5658	15.5714	364.672	21.3816	24.464	8.91	2.03172	4.83971	3.1483	6.82375	4.36697	1.75336	76	-0.0132139
40.3022	男	49.2073	153.514	29.0939	0.0325315	13.2492	125.787	85.4976	87.6574	20.9924	98.4489	37.6324	11.4585	972.976	15.1435	25.3908	1.0172	3269.69	13.9601	24.925	1.3	3.40752	5.06576	0.0754082	3.14913	97.7695	2.02071	105	0.946811
52.0636	女	63.8071	165.08	28.7022	-0.0206517	3.80469	94.3911	67.5704	77.0077	22.0799	98.6178	36.2405	8.81383	1035.57	14.5315	15.8827	0.651253	418.574	13.319	28.5036	5.2	4.05526	3.05672	0.82692	6.75549	200.423	-0.692962	无	0.0588344
41.0903	女	115.476	158.454	28.705	-0.0223507	8.8336	108.52	53.2205	65.7791	15.0523	100.173	36.4897	5.13862	1415.72	15.1152	24.181	6.49011	411.578	18.6006	35.699	22.3	3.63871	2.07704	0.375847	3.30431	166.079	50.9025	无	0.0269154
52.9933	女	45.9655	152.573	28.4304	0.0138243	4.11741	126.395	67.5274	80.1702	19.233	99.651	36.6846	1.50603	730.865	14.3129	13.8243	-0.499384	476.396	11.6848	33.2927	3.2	4.09312	3.11656	-0.215448	1.17166	147.618	7.972	无	0.0526732
65.885	男	67.0112	158.454	28.0193	0.0215905	4.01207	125.516	88.0044	99.0122	22.4509	96.4076	36.4735	6.14402	780.287	14.7511	11.3766	0.596715	1863.63	16.057	27.3062	12.8	7.06245	5.81421	3.14571	5.00468	204.648	1.41807	无	0.0568223
55.1726	男	48.8877	149.239	28.6605	0.00919643	3.41371	118.448	67.0813	80.7077	20.2098	95.0714	36.6503	7.87608	1280.85	15.2815	18.181	0.912554	674.051	15.1984	42.4167	6.5	4.84616	3.76179	4.0662	1.00007	110.269	5.421	无	-0.0194037
45.2603	男	46.657	158.454	28.5809	0.0145111	3.83352	136.741	97.4732	104.535	19.2424	100.141	36.3317	2.75983	690.532	15.2054	19.1796	3.90935	260.088	9.49451	31.3	9	8.14626	5.0775	2.81977	0.872798	1.93265	18.6562	35	-0.044257
54.076	男	55.1463	158.454	27.6525	0.0792405	3.16972	118.986	54.7845	64.7559	19.1545	95.6311	37.0712	9.76048	1782.53	15.5402	14.015	0.667619	-358.352	20.0999	23.617	9.8	0.574741	4.87676	0.98092	3.06165	112.527	5.46849	280	-0.0024225
51.1901	女	76.4966	158.454	27.4369	0.0499481	1.73144	178.624	82.2451	103.662	20.0268	95.3332	36.8345	2.87601	676.538	11.8782	17.9212	0.580092	1.72889	10.339	19.941	2.8	2.2526	2.6929	0.987912	1.24836	79.8608	50.0469	无	-0.0408845
21.8935	男	61.7931	150.871	28.1	0.00888614	4.73417	144.207	65.8913	81.9584	19.2562	100.983	36.9427	2.12047	255.373	14.6799	11.4152	1.38301	252.973	11.8663	26.4192	6.2	3.77608	4.18994	1.2004	0.839501	86.9114	7.1348	无	0.00772741
74.8398	男	44.3216	158.454	16.2006	1.04388	3.93261	108.866	68.6572	75.7648	17.3895	99.5249	36.4124	8.58666	319.341	12.8945	22.3888	-0.273956	1809.41	9.36075	38.65	7.7	1.74884	4.27281	2.89051	2.65	53.1151	17.105	138	1.05303
63.705	男	60.0154	158.454	26.7836	-0.0481293	2.74598	132.711	71.7331	84.3049	18.63	99.8399	36.9421	4.87491	564.325	13.4187	21.9591	0.382916	-55.0457	16.4303	56.4602	1.3	0.970974	7.3045	0.959793	1.16051	21.3587	16.1209	227	-0.00787651
53.2087	男	40.6157	158.454	5.43942	1.01855	6.86226	122.071	58.0082	72.8121	28.6478	100.109	37.2162	13.9869	2439.86	7.46674	28.2229	0.894059	876.325	15.4937	37.0316	5.3	2.11041	6.03657	-0.358576	3.07404	184.78	43.0208	1095	0.00702652
41.3242	男	72.7189	158.454	23.1317	1.08434	23.5142	137.838	77.2034	89.491	18.6932	100.371	36.6966	11.6538	-141.142	14.3968	30.5945	3.37302	5012.39	12.0491	27.6735	3.71	8.0418	2.1224	0.266278	0.744309	313.599	14.1482	无	0.995604
42.533	男	67.9429	153.669	28.05	-0.0101638	0.47469	111.573	52.1858	65.2356	19.2867	98.7363	37.0578	5.56596	742.968	13.0261	20.5274	9.65741	743.537	17.0251	33.5158	12.8	1.81062	8.26787	1.83569	0.8326	198.577	17.0701	无	0.0376038
33.3369	男	57.7826	158.454	2.88016	0.960489	1.9727	129.684	56.7415	78.5867	14.5525	95.6647	36.5592	5.73114	213.289	13.8709	21.0689	3.04779	4874.83	13.6167	36.7762	1.8	3.87095	1.87457	0.0501793	0.803905	53.7502	25.1494	105	0.968718
36.0879	女	71.7819	158.454	2.49947	0.969604	2.06228	115.918	81.606	91.5443	22.7823	92.6406	36.143	3.78912	498.676	10.0023	27.7006	2.6018	471.379	15.1281	16.2921	0.53	6.71107	2.21719	2.98443	0.834622	2.13659	15.4596	35	-0.102893
56.4648	女	76.5493	158.454	27.7809	-0.0507913	5.55632	138.103	74.0465	92.1674	25.4852	97.3584	37.1386	6.69183	946.727	13.2757	11.6981	0.60524	269.025	12.7543	36.9534	8.4	-0.057294	4.05385	-0.0150427	7.92612	59.8628	6.17037	23	0.0220579
50.5654	男	75.1226	158.454	29.4625	-0.0365803	1.74435	175.394	77.8846	111.961	20.066	94.1785	36.8794	3.56653	672.661	11.8388	17.9838	0.181545	-431.857	10.8308	22.8529	14.7	2.27413	3.17867	1.12431	0.939159	62.2219	49.9043	125	0.0462751
53.2396	男	52.3119	158.454	19.5685	0.982729	20.8723	155.605	102.755	115.449	27.9336	90.7136	37.0631	3.17417	872.592	14.4537	21.404	-0.173966	214.626	14.4915	36.7132	2.3	1.99891	4.03639	3.25653	0.851453	45.3022	1.76336	无	0.0209104
84.2815	男	54.9139	158.454	6.44672	0.934482	3.54008	159.498	128.816	138.937	22.887	86.7391	36.982	1.70497	391.487	13.5963	19.0715	0.840467	75.8025	16.2073	16.3956	3.9	4.21915	6.25348	0.0386031	2.82695	27.4883	51.623	23	-0.0299916
39.9628	男	70.7099	174.403	27.8986	0.000728021	0.81718	119.831	50.999	69.0387	29.399	98.6824	38.0986	6.34847	1217.14	7.70915	27.1698	1.80261	176.866	13.079	10.194	5	2.37113	7.04371	3.10055	2.94778	177.746	-0.864504	32	-0.0531697
51.4415	男	73.8731	158.454	26.387	0.0420581	1.09204	176.992	83.4735	108.58	20.174	95.4424	36.9025	3.06322	556.195	11.6911	17.6403	0.601227	352.139	11.0549	20.0915	2.9	1.85005	2.70981	1.05048	1.03828	73.4469	49.7992	无	0.0231648
40.8787	男	71.7138	158.454	22.7974	0.957687	23.5119	139.955	75.8825	87.5446	20.2162	99.917	36.8115	12.081	233.894	15.3219	31.3008	2.02936	5256.37	13.2959	28.0625	4.5	7.95242	2.28392	0.156186	0.927804	307.635	18.6404	234	1.00663
75.3239	男	48.4805	158.454	29.631	0.0708188	1.71378	63.2884	39.193	48.1478	15.5446	99.0391	36.2873	14.8915	1226.13	2.88786	47.6497	4.60883	726.809	13.7988	28.6382	21.3	8.55366	2.81471	-0.0710555	3.26447	161.502	9.9033	无	0.994107
59.7688	男	94.0744	158.454	28.0205	0.0238097	2.12252	67.0404	35.1674	43.0835	16.2769	93.9383	36.8526	7.76393	787.858	14.9815	19.6753	2.44951	2560.22	11.5851	36.6649	14.5	0.368311	5.24503	3.16507	3.11597	183.249	4.34111	无	0.0853734
60.012	男	69.4833	158.454	28.2265	0.0480387	2.0411	95.0686	48.5476	62.1419	25.7172	100.532	37.0679	9.1064	387.389	15.1408	20.0217	1.2416	1929.16	15.8703	28.9266	2.2	4.57353	4.98235	1.17046	2.63688	120.302	0.344866	无	0.955647
69.6196	男	83.8787	178.4	16.703	0.969336	1.23431	130.349	70.9254	91.2885	21.5355	92.5872	36.535	1.82829	61.0017	15.316	9.59621	3.76745	893.991	13.0855	29.2409	16.2	3.09872	2.22997	0.166164	1.11954	129.903	0.74248	无	1.08315
70.0815	女	72.1629	158.454	27.395	0.0398322	12.3614	130.852	93.5778	105.947	23.9942	95.6202	37.4617	11.5723	3035.2	14.9027	13.7515	1.10689	72.2489	15.376	31.4292	7.7	5.00014	8.2219	2.89867	7.13822	241.285	4.29901	无	0.00148892
52.7059	女	53.0031	158.454	23.5217	0.949101	4.22939	140.017	54.0238	77.4225	22.0734	100.476	38.4323	8.60017	2830.08	15.4433	19.1172	0.273243	305.29	13.4679	9.99507	4.4	7.21075	5.08411	3.97416	0.90077	187.477	43.5255	26	-0.0859874
58.9169	男	72.763	158.557	27.6881	0.0414973	5.32222	124.119	71.0717	88.2763	31.5595	98.9791	36.7356	10.4839	45.6138	7.37709	24.3332	3.28834	25941.2	13.3869	27.7621	3.9	5.81003	2.09944	3.03676	0.658714	152.843	49.3968	452	0.991605
23.4747	女	77.4222	158.454	29.2581	0.00800999	3.60415	124.375	48.7364	66.4507	15.9016	96.6497	36.8345	4.96493	142.989	13.2216	14.2806	0.883929	1583.87	15.776	32.4184	6.1	3.7859	6.08264	0.789582	3.00184	43.0242	2.24294	无	1.04495
26.5698	男	75.5294	158.454	28.5474	0.0257888	3.11948	129.176	50.1637	64.5305	15.396	95.6835	36.7544	5.09421	186.315	12.7551	13.5096	0.912727	1507.5	15.2597	33.715	21.9	3.8276	5.6062	1.24481	2.99824	37.3441	3.78406	无	0.982899
33.6474	女	54.3793	158.454	1.61895	0.945202	1.73052	131.158	56.0249	81.7145	14.1459	96.9742	36.5669	6.26245	236.128	14.4002	21.9088	3.62513	4582.77	13.4771	35.1713	4.7	3.85416	2.02314	-0.00188439	0.743979	59.6789	30.527	78	0.930914
88.2579	女	53.7188	158.454	28.242	-0.0417221	2.8276	97.2969	80.933	84.4812	19.8913	85.5652	36.3721	9.80147	474.503	6.04143	35.565	3.47509	649.938	12.9242	31.9916	41.1	8.20791	1.78176	0.0435816	2.66875	186.529	25.0297	无	0.992293
70.2791	男	53.187	158.454	2.41907	1.02784	1.71088	101.873	36.4776	52.964	21.9509	99.0035	36.3295	12.2722	568.602	13.8037	24.509	7.78551	1639.3	12.9477	25.2174	25	3.69879	8.03348	0.911433	2.98002	27.1816	0.37351	无	0.959846
60.0033	男	76.9164	158.454	29.1192	-0.0442056	3.23847	142.731	56.4292	79.1367	17.0086	99.3031	36.5359	10.1471	399.44	7.19332	25.9858	2.83634	1189.52	14.3002	31.9135	5.3	4.84123	0.776501	-0.203669	2.9468	213.813	6.14603	无	1.02304
50.3856	男	98.7813	166.533	29.5515	0.0215915	0.149031	119.79	53.1585	68.3159	26.4246	95.7702	36.1364	4.7732	1688.75	13.2605	26.8619	1.93868	555.364	13.5387	26.6739	12.8	4.5438	2.76829	-0.0927157	2.90476	165.705	2.27718	227	0.0362299
52.1825	男	60.9343	121.973	20.2535	0.936273	3.48386	116.058	69.5436	77.7111	15.5203	98.3231	38.4104	11.7089	2340.87	15.1872	19.9264	3.78689	378.028	23.5625	33.4157	14.4	2.25682	1.31384	1.03365	2.98096	21.7743	3.86209	无	-0.049481
39.0122	男	73.6053	158.454	1.46403	1.03954	2.16389	117.711	80.4218	87.8247	22.7309	92.3271	36.1649	3.60514	842.153	9.69969	29.1238	2.02233	152.532	15.0499	20.5765	16.2	7.32412	2.20913	3.10337	0.748286	6.53721	13.8963	241	-0.0330634
44.9953	男	79.8169	158.454	26.7655	-0.0574519	3.80544	131.381	66.5209	84.0504	23.9195	95.3377	36.5526	6.93229	563.077	12.8588	17.4652	0.128969	3619.31	12.2011	28.8632	8.41	-0.0834046	1.99919	0.0248342	2.90075	203.185	40.9484	无	1.03544
65.6239	男	53.8616	163.994	27.7703	0.0257445	3.78388	113.667	86.918	94.4318	31.5906	99.1845	36.7722	4.12151	424.156	14.9988	25.5152	2.58117	1103.16	16.1917	47.6157	1.8	-0.0759779	3.03613	0.0532205	3.12173	221.132	4.56568	无	0.959767
55.0143	女	64.8295	158.454	2.66779	1.02916	0.731462	110.792	53.6156	67.0651	-0.602836	98.6287	36.8012	9.22134	444.7	13.988	28.9269	7.82657	1773.9	15.8186	27.0623	10.4	6.11557	0.951521	-0.051732	2.92012	106.736	26.3576	无	0.949306
56.6297	女	92.8994	182.718	6.5292	0.967521	3.6786	131.408	79	80.1948	24.1656	98.1771	36.7873	5.07588	518.58	14.2187	11.6502	2.40666	-77.3064	25.4826	34.9344	9.3	5.376	2.11144	1.07617	0.618365	98.8419	22.987	24	-0.0552158
74.6452	男	50.8073	139.566	27.9254	0.0271301	3.18031	139.041	62.6877	76.0119	20.3194	93.0217	36.7264	5.7903	360.32	14.4123	27.8135	1.78948	694.183	12.2715	28.4629	2.89	4.1042	5.8678	4.22761	2.89211	94.1223	1.68668	35	1.01649
59.2779	男	80.151	158.454	27.686	0.0121401	1.57134	95.3263	67.0585	77.8797	19.7784	93.6978	37.3716	4.11624	927.836	8.09751	20.169	0.436506	368.442	15.2466	37.3696	10.1	-0.177875	2.19432	0.108182	0.755731	144.189	16.1453	无	0.0144825
63.162	男	54.3093	158.454	1.45897	0.974883	1.73039	92.9185	43.1211	58.0674	16.4682	93.3312	36.9962	6.03915	2685.94	12.9154	28.4953	14.7727	-356.176	14.2932	30.6513	5.2	2.5872	1.95051	0.124261	3.06098	129.641	5.02937	无	-0.0320442
64.0975	男	66.3078	153.909	3.10019	0.952988	2.98165	143.849	80.659	99.5071	19.2938	96.3783	36.4063	7.29486	481.93	5.75545	27.697	0.720012	1929.94	17.2761	52.5918	16.7	3.71564	1.9179	2.04513	2.07278	339.771	8.94435	43	1.00024
64.462	女	65.9934	158.454	30.0512	-0.0914844	3.67087	127.17	88.9557	98.2367	22.9627	96.0095	36.4873	6.24474	832.521	14.7835	11.7217	1.18798	980.074	16.7554	28.8335	1.8	7.01867	6.00425	2.76927	4.62138	205.671	-0.773216	256	0.0715386
60.1585	男	45.5475	158.454	26.4219	0.0162983	1.15991	134.171	83.9819	99.2689	17.3044	100.085	36.5524	5.0096	1018.93	11.9374	15.0299	3.16304	1125.87	12.8369	32.6976	4.2	-0.16711	6.8844	2.83965	1.17325	12.6557	4.55094	无	-0.0456299
63.9244	男	77.3575	158.454	4.42135	0.927059	0.920684	109.649	69.5969	85.0255	33.0097	65.634	36.6115	7.71736	603.403	10.9497	25.9837	4.38132	1220.5	16.2016	42.0043	3.2	5.04972	2.06427	0.0698213	0.746138	58.9252	-0.0588982	125	0.908571
71.2143	男	56.9679	158.454	29.9864	0.0044443	7.42551	154.788	109.526	118.578	14.9333	96.1696	37.3569	10.7943	389.205	8.79547	24.4873	0.830314	985.987	23.1253	45.8574	6.8	-0.140997	2.89492	-0.00167909	3.35589	67.1998	39.2141	无	1.02132
43.2718	男	44.4013	158.454	28.0067	-0.0122802	3.36611	134.804	94.3333	103.46	19.0084	99.765	36.3724	2.82681	611.484	14.7446	17.8374	2.5431	-10.4183	9.79688	33.8437	14.5	7.73017	5.09162	3.06751	0.988867	21.2967	18.1179	无	-0.00517175
61.978	男	80.2606	158.454	27.8135	0.0316571	2.66699	95.3812	68.5412	76.5763	20.1169	93.5517	37.4366	3.90069	974.179	8.15539	17.9135	-0.0882385	100.033	15.5245	33.6062	9.6	-0.300146	2.23779	0.257323	0.715505	150.076	13.9139	无	-0.0332611
52.2746	女	99.0165	158.454	27.6491	-0.0140793	1.31921	101.079	81.0098	85.9442	25.7615	91.8389	37.5452	3.08444	2629.55	11.7651	21.1913	1.62092	-36.7709	15.7888	27.2093	5.2	7.3984	2.85934	0.111443	2.73934	62.2652	1.57375	1072	0.0305467
64.7881	男	67.7303	158.454	27.8229	-0.0153566	3.50323	127.418	86.3543	102.694	21.8928	95.5254	36.4164	6.22528	868.041	14.9373	10.9988	-0.0979022	1039.76	16.536	30.5464	10.2	7.22669	5.97447	3.19323	5.07945	210.213	0.67971	无	0.0393135
48.8214	男	77.6749	158.454	23.3376	1.03411	3.57212	105.875	55.8627	68.7187	19.1964	97.0225	36.8744	4.9839	430.646	13.4498	16.0901	6.36278	1076.93	12.3576	27.6309	41.1	4.44129	4.09021	0.0145331	0.910684	253.04	5.15748	143	-0.103447
52.3923	男	69.3664	158.454	25.8288	0.0156181	2.79762	125.411	58.0691	75.1004	11.556	90.7341	35.057	8.00508	428.13	3.29001	32.0347	0.912814	647.241	14.4558	22.3501	3.55	7.13769	5.91477	-0.123904	2.97794	107.146	-1.28575	12	0.969429
49.1306	女	76.4628	158.454	29.5053	0.0147371	2.15507	176.01	83.699	110.219	18.9552	94.2958	36.8538	3.04514	692.922	12.2632	17.1463	1.32247	173.666	11.3979	26.1353	0.9	1.89035	3.0908	0.991118	1.36812	64.0351	50.2485	87	0.108564
42.7094	女	56.8767	158.454	26.6022	0.0218741	2.65878	152.813	104.568	112.542	18.8028	83.5916	36.7401	10.8375	340.779	6.85421	39.3588	0.473245	1091.04	13.0688	33.2662	28	8.33746	6.10861	-0.123526	2.84039	55.0006	3.73986	无	1.02733
75.3117	男	45.0746	158.454	6.24824	0.928422	7.04656	85.6194	45.6077	57.2598	27.1143	87.7654	37.7764	2.7085	341.627	15.1584	23.4069	0.685377	144.74	13.7275	29.8206	22.3	3.99157	4.21183	3.23919	3.01369	143.534	8.65219	无	1.03167
62.1772	男	59.9468	158.454	27.5786	0.0352764	2.9462	135.983	69.1899	85.3558	18.5094	99.4023	36.9389	4.44703	587.824	12.9318	23.4392	1.14168	137.769	16.692	55.0269	3.3	1.05632	6.8815	1.12132	1.32409	16.1381	16.5231	453	0.0549443
48.1862	男	81.5972	164.694	28.5777	0.0285492	2.47326	146.645	92.8773	109.115	14.9251	99.9207	36.9518	3.78102	789.644	8.94281	24.6093	1.75304	777.822	26.8295	48.7683	21.9	7.98908	2.81564	2.0799	5.06175	77.3085	1.51748	24	0.00079959
52.4984	男	70.9527	158.454	26.4312	-0.0473909	2.97446	125.248	59.7696	76.8485	10.6604	91.0322	35.1124	8.14904	439.173	3.11949	32.3888	0.733532	363.307	15.014	21.9719	11.2	6.24853	5.93985	0.189711	2.63329	104.797	1.98304	75	1.03732
51.0326	女	61.9675	164.439	28.4537	-0.0113774	4.10999	99.9637	69.5125	75.4453	21.9779	98.1768	36.228	8.77858	1020.21	14.8259	15.7361	0.430183	-460.435	13.5668	27.7142	2.89	4.40921	2.81076	0.689931	7.11536	209.495	1.59577	无	0.0336376
70.256	男	57.5288	158.454	29.9871	-0.00183224	8.04902	154.85	108.497	118.742	15.2971	96.1563	37.2474	10.9251	421.14	9.43544	23.9544	0.883381	1593.73	24.117	45.0687	1	0.125207	3.11039	0.0902764	2.73454	60.3995	35.4709	无	1.02525
78.429	男	53.5632	133.409	18.2519	0.993731	5.8452	62.4734	38.2819	49.9651	22.684	91.5064	36.8263	10.1469	2445.13	14.9533	21.0587	0.690627	321.918	12.7994	28.7674	4.4	2.08411	4.77282	2.79882	3.32111	182.225	3.38923	227	-0.0150847
80.1349	男	46.1923	158.454	0.556222	1.01556	0.637336	96.0402	50.3586	64.6504	19.0132	94.8064	36.5389	11.164	1028.74	7.18035	28.0693	2.54284	9777.98	12.0981	26.4885	0.8	3.98425	6.45621	-0.00111372	2.81218	489.9	15.5329	无	1.00806
42.8791	男	51.3881	158.454	27.3502	0.0667207	1.12268	177.263	79.0358	98.637	18.7709	96.247	37.1028	4.65994	628.589	10.4245	13.6425	1.03978	-362.302	12.1482	44.3336	4.2	2.04167	3.25342	-0.0478456	3.6778	141.013	11.1292	241	-0.0275618
79.8426	男	60.3716	150.818	28.4181	0.0504247	1.88017	92.6626	50.1337	59.9344	19.5501	99.8115	36.4308	5.31408	1093.2	12.3009	25.4143	2.56484	1821.92	11.2947	29.758	4.5	5.84769	1.00246	3.10157	10.3349	202.155	3.35619	无	0.000600287
70.2179	女	61.7004	158.454	28.0188	-0.0611668	4.26119	110.778	48.9556	73.331	17.82	90.6488	37.367	8.35512	2341.98	14.5891	25.3371	17.1247	839.189	17.8515	53.603	4.16	5.15723	4.16962	3.03503	0.818169	79.8821	8.4933	无	-0.054738
74.0433	男	68.9244	158.454	0.460293	1.029	1.09229	106.183	39.1517	58.2314	13.5477	98.9505	36.8156	9.64409	2140.41	15.1298	22.4202	21.9984	-432.519	15.6613	39.89	15.3	4.66669	4.67993	0.206469	3.00457	246.431	16.9411	无	-0.0370368
74.8522	男	52.3762	140.212	28.4789	0.0619459	3.09873	136.479	64.1107	78.1407	21.4947	93.2888	36.7027	5.74049	242.032	15.2481	27.0513	0.423784	508.391	11.4426	27.361	8.4	4.04745	6.49344	3.90761	3.17202	93.082	5.75881	无	0.986775
51.9708	男	64.0814	165.414	29.7712	0.0180304	3.85838	100.492	69.4738	73.1814	21.8232	98.988	36.2533	9.3752	1030.4	15.2601	13.5304	1.1206	822.721	13.5914	28.7331	0.53	4.1432	2.88459	1.10885	7.17887	194.791	3.27332	无	-0.0442079
59.1638	男	54.2779	145.578	27.8126	0.0508541	2.34306	109.398	40.8801	55.3528	16.7274	99.8976	37.277	3.95374	662.241	13.6753	16.7961	1.70813	44.8971	14.4472	-1.86873	4.2	3.94934	7.97644	0.0249005	1.10097	242.514	13.4521	240	-0.0236576
55.7838	男	43.2772	168.75	28.7065	0.0937985	7.7361	147.857	74.0836	97.2204	18.0799	93.0275	37.2808	5.30076	1416.06	14.8084	13.6522	-0.316693	154.757	19.2591	36.4938	4.65	8.09457	4.63708	0.748991	1.28581	150.105	1.11401	无	-0.00767912
79.1741	男	88.087	179.312	26.7305	0.0477184	3.75039	162.042	60.1143	93.0587	29.4119	91.7154	36.3703	2.55909	450.01	14.2901	20.4841	1.27692	368.225	14.1029	31.6008	4.5	0.747207	2.09509	2.859	7.97193	117.837	2.38032	无	0.018844
58.7638	女	50.0708	158.454	7.30113	1.01162	1.28547	113.672	18.2149	32.0575	24.2728	86.8382	36.4438	4.92145	77.6483	4.77783	27.7435	8.72622	1100.96	13.7394	37.8989	9.3	2.75371	1.78366	0.976994	0.916295	76.7841	13.3231	280	1.04447
64.7177	男	66.4588	158.454	28.4637	0.048715	3.70688	127.72	86.7821	99.7643	22.4421	95.0169	36.5765	5.63364	813.051	14.9126	10.7125	1.06954	489.63	15.7429	31.3867	6.8	7.06036	6.01988	3.17073	4.92083	190.622	2.54579	23	-0.021726
60.6961	男	41.9831	158.454	29.4569	0.00675369	2.43122	117.773	96.9607	103.577	17.6198	95.4589	36.7607	0.869769	251.992	15.4596	17.3941	0.741703	601.317	20.8877	40.9706	28	5.17303	3.89357	0.0711793	7.19593	262.138	17.5921	无	0.062543
59.5341	男	45.5897	152.246	28.3491	0.0011142	4.63624	122.163	59.4492	79.1132	19.7296	95.1408	36.5662	8.0102	1366.97	14.9861	16.9962	0.363179	-97.1518	15.7682	41.2251	4.16	4.5219	3.78925	3.82079	1.08335	89.2204	5.64882	24	0.0439693
40.1524	男	60.6681	158.454	9.91269	0.983619	2.75975	116.992	76.3339	87.7498	15.4518	98.6355	36.4369	8.46062	390.075	14.788	24.3063	2.08261	1685.12	18.0363	20.7783	3.3	0.133117	4.84271	2.97846	7.06649	158.83	3.50987	398	1.02361
50.1358	女	53.7345	153.848	16.8193	1.07288	17.0754	142.092	64.8104	82.929	25.0333	87.8949	36.9681	8.90851	137.824	14.744	16.2209	0.115873	26112.8	22.2254	47.6415	21.9	2.86148	4.04415	4.30972	3.18152	94.5293	18.443	无	1.0072
50.8226	女	53.0981	153.309	26.7726	-0.0381496	13.1349	104.641	43.5015	61.8857	18.0573	96.041	37.2176	6.33786	977.216	15.097	20.401	2.46446	531.742	13.1379	48.6317	6.1	7.95083	1.74941	1.01707	2.53184	71.938	7.94072	无	0.0149492
83.0293	男	55.9962	158.454	7.85341	1.07143	3.31773	155.922	127.954	140.085	22.4236	85.5116	37.0061	2.45007	609.743	12.6112	18.4129	0.725194	-88.3755	16.5193	17.4056	11.2	3.65842	5.85357	-0.0502429	3.07077	7.42015	48.0435	35	0.0556074
61.9521	男	54.1593	158.454	22.7661	1.0233	22.8558	134.657	92.5514	101.75	17.9063	100.404	36.697	12.4518	6764.1	14.9279	20.4934	1.88004	1294.73	15.6329	39.7233	5	6.78284	8.1297	0.0754797	8.04989	64.4372	0.199628	无	0.0573186
62.5668	男	73.5964	158.454	1.55621	0.934774	2.88703	131.011	87.3845	102.654	23.2134	100.188	36.3769	2.0897	134.94	15.0972	15.3703	1.08693	827.343	13.9539	32.4951	21.9	1.24636	2.50891	3.11718	7.38091	112.813	-0.58043	222	1.06254
49.4526	男	56.5727	158.454	27.5386	0.0171373	3.30111	121.369	99.0885	104.149	20.1926	94.186	37.2368	6.38155	379.344	14.3789	23.6739	1.67009	1973.02	14.6007	28.3035	13.61	3.00838	2.09339	2.92998	5.65109	98.2564	33.4768	453	1.00194
56.8183	男	51.4075	158.454	0.690996	0.902111	1.36044	82.63	61.0857	67.9306	25.2695	96.7993	36.2506	9.14516	1377.11	14.1947	20.1544	2.54137	1389.04	17.6708	24.8365	4.7	7.90239	3.82063	1.07714	3.35544	186.574	16.5601	296	0.0259975
59.1354	男	68.5244	157.392	27.5713	0.029157	4.47931	136.586	75.6102	94.3748	30.1555	99.2123	36.7806	10.3303	63.24	7.79174	25.9562	2.78996	26175	14.3143	30.5383	8.5	5.9703	1.92821	2.94952	1.01721	174.375	53.5883	无	1.06294
76.8309	男	82.5042	158.454	27.9351	0.0412635	0.709685	138.399	54.0632	80.1692	19.7291	96.8766	36.4421	2.97446	542.263	14.3437	12.6821	2.76274	189.76	11.1395	14.3821	4.5	0.12475	5.00618	4.11041	3.11161	130.778	4.89654	无	-0.029218
41.8576	男	64.7399	152.839	30.0612	-0.0276116	1.13904	111.576	49.6309	66.324	18.7254	99.262	37.0472	5.54955	598.031	12.9126	20.8579	10.2999	476.376	17.1226	34.3099	4.7	2.11233	7.93167	2.02605	1.38254	201.815	18.1225	257	-0.0149162
78.9213	女	54.7076	158.454	27.7575	0.00575896	2.23436	61.7513	33.4924	47.2048	15.3593	98.1022	36.3962	15.2709	988.077	2.6396	47.1422	3.93243	488.231	13.2293	31.1525	13.61	7.98087	3.17659	0.0739798	3.128	164.511	7.03514	无	1.00075
57.5955	男	62.2796	160.606	27.6482	0.0910896	2.91878	99.3289	55.3489	69.8448	14.9538	99.7955	36.388	12.179	2074.22	8.94982	21.9365	12.4363	105.826	15.0067	23.0952	12.8	1.27871	3.04253	0.883469	1.09139	54.6025	6.83798	无	0.0421417
65.3048	男	41.4488	158.454	27.3643	-0.0235745	9.13155	106.984	63.6427	75.9488	14.0072	100.812	36.5584	3.34222	183.69	15.4194	24.6224	1.37535	11090.6	17.5049	63.5371	3.55	4.24747	2.17753	2.87394	1.0553	26.5015	4.71745	12	0.0428713
48.6169	女	50.9181	158.454	5.34053	0.950641	4.60415	120.168	68.9892	82.048	21.8798	93.6385	37.2758	7.10501	1184.41	12.0482	30.3506	0.587814	634.277	19.9455	43.833	11.2	2.10541	4.93851	0.145129	7.88964	17.9108	6.37648	无	-0.0108148
88.1053	男	51.7994	158.454	27.8221	0.0690651	3.20182	86.8213	64.2916	68.444	16.5037	98.7154	37.1509	2.21475	896.224	13.0037	20.2893	9.83901	-251.456	20.6106	48.6864	6.5	8.01393	5.2592	4.98781	0.993497	159.814	1.18263	无	-0.0706709
79.8714	男	48.2316	158.454	-0.267448	1.09148	1.50543	92.5449	52.3294	64.8518	21.5688	93.7889	36.6952	10.8428	955.844	7.4775	28.5928	2.4913	9598.45	11.8687	29.4293	3.2	4.16762	5.96744	0.0437515	2.83668	478.944	18.6643	600h	1.01153
42.8773	男	50.5619	158.454	29.297	0.000172267	1.5485	179.363	81.0109	93.1928	18.4264	95.4274	37.0942	5.37711	492.433	9.58254	12.6912	0.402572	269.807	12.3678	44.9898	3.71	2.08014	2.81009	-0.0470303	2.98983	149.883	10.4163	无	-0.0430185
53.9829	男	54.0635	158.454	25.2835	1.04715	4.4158	141.162	56.6339	78.3858	21.7708	98.9592	38.3711	8.7456	2712.49	14.6251	18.7215	2.01815	8.06007	13.201	10.789	8.2	7.27051	5.42577	4.13795	0.466813	197.43	44.8462	无	-0.0697961
56.7473	女	46.337	150.955	27.4106	0.0625305	4.83643	121.502	65.8161	79.1053	20.2222	94.8913	36.579	7.92961	1219.12	14.5287	19.4069	0.61031	352.144	14.723	44.1385	14.7	5.22939	3.64313	3.9067	1.09793	86.4922	6.50395	无	-0.0592061
64.1058	女	51.5963	158.454	26.1677	-0.0346096	1.32198	102.194	68.5378	82.9173	22.3208	96.064	36.6501	10.6709	3491.42	15.1087	24.8413	6.50517	149.068	15.9958	26.9263	4.4	0.740343	2.85554	0.979186	7.97221	125.4	1.58635	35	0.0152893
53.0546	男	63.3023	158.454	28.989	-0.0226217	3.33138	101.582	18.0166	39.0354	26.5119	99.9753	36.5295	7.56194	812.562	8.04856	35.4732	1.12419	118.477	11.3411	36.7629	2.89	3.72308	1.87739	1.12065	0.92326	196.056	52.0303	无	0.0637578
78.3614	男	54.1924	151.736	27.3279	0.0573751	4.23053	115.007	69.9454	83.8222	14.966	96.9317	37.5741	12.5297	1808.27	9.44994	32.0041	1.54592	245.596	16.0261	49.0559	2.6	3.82118	3.49049	0.180045	1.05016	111.377	3.6386	23	0.00182201
46.7947	男	81.0156	164.587	28.7761	0.078544	0.633097	145.063	95.6359	109.909	14.2705	100.02	36.8724	3.72158	1145.97	9.07101	22.8103	1.61504	424.259	27.2105	42.7116	11.9	8.24892	3.35333	1.91961	4.67278	88.6066	-1.68303	240	0.00990213
45.8475	男	82.8721	164.977	26.0661	0.0262377	1.08889	142.278	91.8122	108.084	13.4357	100.482	36.8811	4.0464	1007.53	8.88213	22.6839	1.82542	208.248	27.2604	43.2666	41.1	7.59804	3.29213	2.3008	5.44036	80.9116	-0.179981	57	0.0554128
41.5513	男	54.4871	158.454	28.8762	-0.041011	2.93231	178.339	80.981	99.8671	18.8627	95.9102	36.9897	4.78564	669.755	10.0005	12.6273	-0.343824	153.971	11.9504	41.2825	8.3	2.10066	2.93534	0.0480811	2.97654	159.781	6.77289	无	-0.07235
58.5765	女	90.6358	183.946	4.37107	1.09262	3.51885	130.855	78.9607	79.5329	24.1645	96.7294	36.8193	5.19371	504.712	14.0343	12.6798	1.07064	763.604	25.9993	28.9767	6.5	5.09245	2.47443	0.839915	0.96671	110.253	25.5396	143	0.0243677
64.213	男	65.9745	158.454	28.7173	-0.0247503	0.810437	117.714	83.7065	95.7545	17.1053	94.8675	36.7169	3.16055	816.463	13.5124	20.5074	15.5237	-327.398	11.3366	29.2676	8.2	1.29648	6.07203	0.0566477	2.77964	173.588	2.46429	无	-0.000542924
76.8521	女	82.2304	158.454	28.014	-0.0156219	9.79085	98.929	55.7905	66.5514	14.253	98.2731	38.1895	7.25569	192.329	7.79048	20.5884	13.3029	687.64	13.1847	34.6225	16。3	4.04599	4.1911	3.94121	3.00547	56.7817	13.5527	26	1.02652
63.3402	男	58.348	158.454	27.0636	0.0159575	1.92103	132.627	69.3247	88.0623	19.6427	100.666	36.9425	5.10456	641.639	13.1516	22.3647	0.011177	-446.791	16.4808	54.2622	8.5	0.657478	7.03514	1.06663	1.31658	10.3505	17.9425	无	-0.0226488
65.342	男	39.6243	158.454	27.6004	0.0724445	1.76816	128.133	69.8259	77.4997	22.0961	97.7039	36.9635	4.92467	746.444	14.0612	20.0401	1.52403	-126.93	13.3075	35.9484	5	1.75536	3.99033	0.993422	9.23645	91.7014	1.72444	无	-0.0383163
58.2922	男	71.859	159.022	28.6737	0.0398066	5.71766	125.847	71.8479	91.2849	30.4477	99.0466	36.7974	9.6762	24.3179	8.17941	24.3789	1.73384	25281.1	14.3793	30.4349	2.5	5.69859	1.95077	3.0114	1.19503	146.199	47.8577	12	1.00658
59.3424	女	45.1508	158.454	28.1039	0.0193382	6.13597	92.3282	69.4184	78.9504	23.9455	99.1595	36.3795	2.46115	921.052	13.2069	18.137	1.01688	340.283	5.74062	45.5805	16.7	6.86282	5.95901	0.860075	3.12472	183.855	19.4727	无	0.0772564
49.324	女	54.6051	151.8	28.5737	0.0215954	13.9391	109.219	45.7346	63.9082	17.5498	95.5322	37.1246	5.87617	707.424	14.959	19.9933	3.27488	1043.83	13.0857	48.019	1	7.95336	2.11899	1.15197	2.91816	75.1475	8.7549	无	0.0403294
64.9783	女	54.8574	158.454	5.76014	1.00203	3.12359	96.7525	54.853	67.003	20.4013	85.0096	36.4544	10.5061	8311.05	14.8159	33.8881	9.51511	298.508	11.6554	27.5255	3.2	0.702809	2.0718	3.82254	2.66899	45.5678	0.376342	无	-0.0237829
43.035	男	71.23	158.454	26.4645	0.0260167	5.84532	133.393	74.3586	89.7597	23.3497	99.3092	36.4849	6.52987	288.269	10.1748	22.8616	1.86941	21.8696	16.383	46.9423	10.7	2.37502	2.99385	-0.17019	3.95411	306.69	2.82331	32	0.937182
45.9969	男	62.0594	158.454	29.5875	-0.117911	2.10752	142.672	62.049	83.9386	13.5195	96.1662	37.1908	3.68458	515.083	14.1125	11.5461	2.47865	149.331	15.0527	29.4638	14	0.66205	4.29518	3.05639	0.946161	116.092	-1.88488	无	-0.0787965
63.702	女	65.6269	152.282	4.02244	0.986174	3.82843	143.575	77.9994	97.4778	18.9929	97.1729	36.4141	6.70951	289.627	5.76379	27.1313	0.545457	1239.51	17.2873	52.85	10.7	4.34326	1.41986	2.24603	2.23939	334.32	6.94648	无	1.06165
69.4341	男	70.7494	158.454	27.1177	0.0112488	13.3506	124.907	94.3195	102.254	23.6795	95.8191	37.466	10.6993	3222.71	15.4139	14.0129	1.64068	384.978	14.7479	27.0651	31.9	5.30222	8.09971	2.94588	7.07062	219.217	5.05517	无	-0.0447409
50.0598	男	78.8346	158.454	20.6841	0.946347	3.38007	103.417	61.2705	68.0106	18.167	97.0953	36.8111	5.16324	521.442	13.0856	15.7426	5.81471	587.297	12.1893	27.6539	14.5	4.22907	4.14035	0.107596	1.36802	259.436	5.8158	23	-0.0152487
70.1974	男	68.2387	158.454	27.8144	0.0180078	4.6693	145.342	115.959	123.41	15.4379	95.9916	36.4181	4.84055	865.979	15.2129	29.1739	1.01935	1062.06	12.7989	33.5602	8.2	7.82309	4.22429	1.16475	3.27333	160.79	0.731861	无	0.0618922
75.7767	女	49.7461	158.454	4.79472	0.990469	3.15324	127.552	104.888	114.179	25.2265	91.5398	37.4487	7.94345	1034.81	15.406	18.4355	2.16586	-106.126	8.40867	35.6112	6.2	4.08733	1.98731	0.12505	0.895803	129.625	16.8684	无	-0.0756033
64.9735	女	66.8793	158.454	27.8748	0.0818284	4.31793	125.629	90.091	102.022	21.4839	95.9787	36.4725	6.28169	830.275	15.0064	10.7365	1.17754	821.554	15.8861	28.1801	25	6.67427	6.04066	2.95223	4.59025	197.38	-1.30307	无	0.0699052
47.6003	男	68.9075	158.454	29.4834	0.0733236	1.59231	165.77	77.4096	98.5306	26.7122	99.4188	36.9827	8.7586	928.262	8.09244	25.3202	0.638457	1253.49	16.2633	30.0171	7.3	8.23228	8.1928	-0.167471	1.31626	113.348	1.18045	无	-0.0118818
71.9742	男	74.1118	158.454	26.5755	-0.0217127	2.89483	80.9306	54.4074	62.5679	15.7506	100.656	36.6275	11.9167	1313.42	6.23625	29.7897	1.29744	168.28	16.0252	38.7649	16.2	5.98113	3.29159	3.66115	3.31029	136.529	2.87534	41h	-0.0538054
75.597	女	82.6419	158.454	27.9881	-0.00703104	1.46503	131.952	52.8773	77.2547	19.2075	96.3609	36.5146	3.11522	485.791	13.7886	13.3401	2.50352	-395.535	11.7586	17.9858	1.5	-0.104378	4.94123	3.95966	2.68816	137.612	7.23153	12	-0.0115872
49.4506	男	52.9785	155.604	15.5906	0.996553	17.0355	140.381	67.4547	82.0205	24.563	86.9077	36.9813	8.3884	96.0233	15.0158	16.074	0.224182	25866.1	22.498	48.9897	2.8	2.68794	4.05221	4.18083	3.34449	80.7714	18.709	98	0.96615
76.8451	男	51.3477	136.624	19.947	0.978947	6.21068	55.3943	45.0134	49.5403	22.3941	91.5088	36.6734	9.24874	2524.66	15.0366	21.9187	1.38031	18.2023	13.362	26.3299	1	1.36823	5.32824	2.82745	3.08722	191.422	0.866898	无	0.0206502
60.7251	女	50.423	158.454	28.8706	0.00909075	1.43947	134.242	82.3743	95.2575	17.7796	100.269	36.6272	5.10903	897.025	11.7212	14.722	2.81303	352.281	13.6315	34.0934	4.7	-0.264831	6.58465	3.10748	1.03668	-0.94804	5.08285	276	-0.0303618
70.1399	男	84.207	158.454	9.17697	0.964654	9.36006	137.777	61.7699	84.3463	23.6052	99.8438	37.375	8.15499	1286.28	15.6759	20.1475	4.24604	237.818	14.9812	25.5208	11.3	2.28377	1.86507	3.85416	9.36858	87.356	0.442886	无	-0.0895509
46.8482	男	77.9787	158.454	25.4436	-0.0527017	4.29642	130.649	66.8217	79.7812	23.1305	94.7555	36.5115	7.65024	517.911	12.5896	16.792	0.551112	5011.41	12.3141	27.8538	1.8	-0.102724	2.28664	0.0162816	3.30693	179.708	44.8667	68	0.989668
37.5608	男	68.3192	174.554	28.1953	0.0290266	1.55555	117.948	50.2737	73.3223	30.0809	98.4021	38.154	6.0498	1321.37	7.6214	27.173	2.40589	274.578	12.6967	13.2999	1.5	1.95682	7.21364	3.10864	3.14867	183.242	2.35895	无	-0.0635474
56.9635	女	43.6088	158.454	28.4287	0.0293444	11.5964	137.753	60.9399	74.6738	18.6694	100.014	37.6785	4.25822	2230.38	15.3833	19.6662	9.7624	-622.683	13.3734	43.1737	0.8	8.16717	7.10216	0.898771	10.108	122.179	2.24499	23	0.00957137
63.4398	女	50.3101	158.454	28.3969	-0.0374918	0.971957	104.974	67.4423	81.2251	21.5837	96.2435	36.6474	10.9384	3477.14	15.208	26.1061	5.65678	1354.36	15.8215	29.5354	2.7	1.46045	2.91228	1.02617	8.14069	126.191	2.78933	无	-0.0556112
54.3129	女	46.6805	158.454	1.46309	1.04174	0.0082341	90.0982	58.4769	70.2308	29.1456	91.5375	36.8824	2.09363	113.103	14.7008	17.8782	6.45026	9675.32	23.0875	44.1802	6.5	4.33788	1.82756	-0.0637146	0.908685	272.449	32.0861	无	0.977139
67.0176	男	39.6663	158.454	26.9486	-0.0294399	9.32975	104.926	61.4327	75.7037	14.2231	99.3379	36.5749	3.52519	532.461	15.1771	23.9444	1.56749	10877.1	17.5436	63.6142	14.4	3.75205	1.88439	3.10824	0.987423	19.7257	6.7368	452	0.00855333
47.1364	女	83.2453	164.709	28.6677	0.0118009	1.9176	147.528	92.8837	108.179	14.6365	100.051	36.861	3.33093	969.878	9.4281	22.5737	1.64805	-162.021	26.7656	46.2955	12.8	7.50464	3.30271	2.03612	4.79404	82.5789	3.15036	124	-0.00995264
66.9208	女	67.952	158.454	29.1706	0.0382389	4.93653	155.041	62.9597	81.4571	16.5625	97.8497	36.3968	2.13029	344.979	13.9912	12.8742	1.14396	525.539	13.1668	36.5323	0.71	4.60171	1.87711	0.00867366	2.92398	105.22	2.8428	68	0.0117314
64.0342	男	54.2389	158.454	-0.435925	0.998433	0.940783	88.7184	45.5656	57.833	17.5836	92.2953	37.0635	6.67272	2711.88	13.758	29.5384	14.6844	-22.0157	15.4119	29.2204	0.9	3.5786	2.01983	0.239199	2.91631	118.786	7.26592	35	0.0318681
94.6953	女	64.8295	134.792	28.3138	0.021197	0.86958	143.049	102.12	111.537	24.7072	96.9623	36.9368	2.08884	387.528	13.4972	17.3127	1.10309	-211.486	23.928	39.9721	14	7.04806	7.85261	0.101661	0.854989	51.4927	4.55581	无	-0.0542434
49.026	男	80.9345	158.454	27.5051	-0.0240725	7.01047	120.555	59.8197	80.8856	15.2861	100.097	36.6568	7.51994	318.563	10.2024	24.5168	0.82605	1474.05	14.2104	35.3291	10.7	3.67602	3.1648	4.89403	3.03121	252.182	29.7359	无	0.996983
72.3393	男	62.6907	158.454	27.92	-0.00915795	5.46856	108.707	53.8072	72.4593	18.387	90.2349	37.4139	7.8018	2271.93	15.3402	24.5102	18.2073	156.277	16.797	52.6433	4.5	5.24563	3.89465	2.98682	0.92605	61.181	11.4327	54	-0.155971
62.0062	男	56.4809	145.052	28.3413	-0.00959578	2.03706	108.343	42.7431	58.0278	17.6898	100.89	37.3125	3.9899	491.144	14.26	15.0495	1.81372	773.456	12.5186	-2.9307	2.3	3.97246	7.98092	-0.0116501	1.11464	237.54	13.0474	6	0.0115863
52.9287	男	79.7824	182.004	20.4917	0.9652	7.74334	85.8361	61.9816	68.2145	22.383	98.9226	36.3659	6.01056	1858.66	13.9404	35.6809	22.3789	576.214	8.07527	40.9566	5.5	2.97119	5.67082	0.0123287	0.629698	183.855	14.2172	56	-0.0140916
52.2179	男	47.5176	158.454	27.3367	-0.00824002	11.4907	119.171	72.3583	89.1825	19.3589	90.3288	36.9956	5.30145	1538.86	14.9153	14.6575	4.55866	-86.8432	13.3811	45.1877	31.2	1.22809	7.68451	1.3875	2.97413	11.9784	5.47447	无	-0.0460697
47.256	男	82.5416	165.23	28.0335	-0.0721861	1.94419	145.223	90.9005	110.036	14.3735	99.6059	36.8377	3.63202	962.328	9.12954	23.7499	2.00623	564.57	26.6062	46.6173	12.8	8.08527	3.0015	2.05692	5.03003	90.2557	1.00743	6	0.0147899
69.0573	男	51.9573	158.454	26.9327	-0.0228943	13.3427	98.8571	49.0686	62.7499	27.781	98.1452	37.0905	6.65448	697.864	14.2379	20.2766	2.18204	-57.9466	13.2466	43.9501	11.3	4.69761	6.74087	-0.312501	0.929097	81.326	11.569	296	1.05494
58.8715	女	61.3053	163.44	1.38412	0.986721	2.49694	142.103	128.803	135.434	21.4186	91.3859	35.9441	12.259	340.441	12.1757	27.2433	-0.00396447	4993.19	12.7007	32.4433	7.3	0.91719	1.41164	0.916683	0.960651	109.061	0.454749	无	0.977701
70.8276	男	57.0599	158.454	28.6669	-0.0119414	3.43853	87.7166	48.8363	63.9556	27.2142	100.213	37.044	5.27473	133.773	14.3033	17.5834	8.3895	625.989	16.4766	37.5163	10.4	5.1686	0.596875	2.70339	2.63816	61.6196	1.39027	无	0.95574
73.1632	男	71.4998	156.956	26.8723	-0.011257	1.1641	108.126	79.1205	92.2025	18.3252	93.8322	36.6011	3.10207	500.547	13.7028	18.503	3.28722	177.667	16.3732	23.1155	5.3	2.13012	3.84353	2.94938	3.08137	62.0054	1.65015	无	0.00773061
66.0347	男	68.9782	149.493	4.30408	0.997121	3.82799	102.145	84.8675	89.9938	24.5854	90.0138	36.8315	4.2596	708.073	14.9336	13.4437	1.95469	-17.3594	17.4195	39.961	4.5	1.06681	5.00327	-0.305043	1.14782	20.9026	0.0891947	229	-0.0625665
79.266	女	52.7522	146.182	28.4541	0.0223483	2.66445	168.799	68.7077	85.1813	27.0422	100.329	36.8927	3.94829	473.899	13.7258	25.731	0.0948353	57.2856	14.6627	46.874	8.09	4.23803	7.9286	3.86621	3.11265	92.1647	8.72321	无	-0.0309356
35.9401	男	71.7935	158.454	0.565886	1.04076	1.93872	115.648	85.0702	89.5112	22.6574	91.4191	36.1155	4.37861	585.622	9.88739	27.7962	2.14516	1038.49	14.898	18.4316	6.2	6.90776	1.78409	2.76658	1.23709	1.30904	16.915	无	0.0572635
48.21	男	81.7791	158.454	7.89488	0.969712	3.50433	121.236	64.0602	85.5341	11.3522	99.6774	36.449	6.00277	1067.3	15.2961	17.8847	9.15472	917.894	14.273	83.1865	2.3	7.04556	2.81268	0.0589668	3.046	20.7683	4.82775	无	0.00291279
64.4771	女	55.4258	158.454	2.48218	0.943915	0.332683	88.5612	47.2544	56.9032	17.5488	92.2155	37.1045	6.01823	2816.78	13.0315	29.5192	14.7678	-242.39	14.5101	31.9045	4.58	2.13922	1.80628	8.27896e-05	3.10926	127.957	4.15272	456	-0.0880437
53.6194	男	50.4859	158.454	27.0369	-0.0485731	11.4883	118.258	76.8922	86.2077	20.3204	90.9889	37.0493	5.91634	1448.24	15.7603	13.1056	4.37163	542.465	14.1527	42.0163	14	0.885338	7.94393	1.0465	3.03563	10.7504	3.43034	无	-0.0841801
68.3269	男	49.8614	152.097	3.88412	0.97729	3.68471	96.0862	40.4851	64.0467	20.8651	99.9349	37.0813	7.21561	609.943	15.0564	22.3537	0.672137	114.099	18.2169	42.122	7.3	5.1948	5.38169	3.98395	1.15694	164.72	0.494687	无	1.00759
56.1946	男	63.8715	155.277	28.4536	-0.0164042	2.79757	93.7122	75.3952	78.4402	20.2222	97.2786	36.7502	2.86732	237.601	15.0174	23.6079	0.111862	-931.785	13.89	26.3738	15.3	6.90045	5.01524	3.78598	2.63999	193.588	4.54928	257	0.0403987
59.7457	女	68.74	158.454	28.769	-0.035892	2.06244	97.74	49.1101	62.3389	25.3497	99.9496	37.0597	9.30758	427.196	15.031	21.0976	1.62254	1874.76	15.2852	31.3289	12.8	4.88111	5.23131	1.07882	2.79604	104.253	1.10516	86	0.924222
45.6868	男	46.7359	158.454	27.7531	-0.0604162	3.01897	132.929	95.3611	101.808	19.7286	100.915	36.3638	2.64337	781.514	14.814	17.341	3.19148	303.661	10.54	31.8169	2.8	7.73443	5.09914	3.29505	1.36222	25.9705	19.5244	无	0.0210668
56.1568	女	72.7016	168.377	27.4135	-0.0212613	9.46039	125.424	87.9345	94.1712	21.6766	93.1765	36.63	4.65384	867.87	13.9831	20.5922	2.84734	1001.48	15.7092	31.7279	15.1	2.25586	7.21781	1.06281	7.43839	176.011	4.8103	18	0.06232
58.2051	男	64.8295	158.454	21.8222	0.327267	4.73453	121.772	70.207	83.3849	20.5149	96.0336	36.8044	6.4783	969.562	12.6909	21.6088	3.3531	1393	12.1248	44.9473	0.7	3.92194	3.95102	1.40255	3.08996	125.561	11.7338	241	0.326151
77.6467	女	82.6629	158.454	29.707	0.0277363	1.63705	134.371	55.989	77.5135	20.841	96.2338	36.4883	2.97211	109.461	14.0332	13.9431	1.63984	-158.123	11.9731	17.5652	9	0.210483	4.94046	3.7808	3.26758	142.432	3.73395	无	0.0155161
41.345	女	54.3615	158.454	28.9609	-0.0259833	0.832587	177.035	79.1633	98.2675	19.2441	94.8186	37.1809	4.85702	538.409	9.76858	14.423	0.379491	327.315	12.648	40.7563	4.2	1.55981	3.25561	-0.139384	2.97871	149.969	10.5108	无	0.0237412
15.6082	女	55.0912	151.811	16.6338	0.980749	15.1295	99.6016	68.1143	77.79	21.2005	96.1402	37.1944	7.28037	548.927	14.7302	20.5181	0.941401	1439.37	14.5796	34.7924	3.71	0.959085	1.8882	0.0695394	0.907554	268.598	9.64206	327	0.900071
58.8902	男	67.0147	157.794	27.2066	-0.0431964	2.24134	94.437	74.5946	79.4841	19.5093	97.0657	36.8011	2.80871	245.11	14.8687	24.4099	-0.136982	150.428	13.3779	25.4815	28	6.92857	5.34465	4.16472	3.02954	186.172	2.30572	无	0.098363
75.8401	女	52.1185	158.454	3.07481	0.998535	3.4639	131.018	107.346	113.725	25.7069	91.8657	37.3424	7.93694	1187.73	15.0215	18.568	1.74464	1234.73	7.6392	35.7884	5.5	3.92845	2.29017	0.0400417	0.919399	118.308	22.4185	无	-0.0269589
70.7282	男	67.7567	158.454	28.5129	-0.039548	4.04676	141.238	112.03	122.685	14.9096	95.9499	36.5328	5.44076	1009.79	15.3481	27.6614	1.08835	203.05	13.6496	31.6042	9.3	7.84291	3.90826	1.12278	3.00704	143.756	-0.0931552	238	-0.0437285
73.7739	男	83.4314	158.454	28.4107	0.0267153	1.76013	132.616	52.9484	78.8905	20.0425	98.4603	36.4551	3.48484	313.857	13.609	15.2707	2.4347	-190.423	11.5873	15.0852	5.8	-0.0882575	4.90161	4.10863	2.84402	127.596	3.46992	23	-0.0119551
41.1632	男	58.8295	158.454	24.7959	0.916755	5.53872	176.496	85.2455	106.429	22.4055	99.8783	37.1652	4.49531	706.38	6.90672	31.2428	1.01578	-23.4214	20.1657	43.4774	6.9	6.21666	0.801792	0.0777506	1.25306	40.4747	1.00766	32	0.0708144
80.0073	女	87.6874	179.272	28.6385	-0.0167635	2.58951	161.676	60.0853	88.2444	29.3721	92.2404	36.2632	2.91113	462.328	14.0421	20.8795	1.58383	520.747	14.0492	33.4854	4.6	0.512218	1.87688	2.89893	8.32487	140.176	3.33364	无	0.103436
48.0656	女	47.316	158.454	26.5245	0.0140356	2.49283	111.624	80.4589	87.3539	20.149	91.6939	36.0817	5.38768	737.638	14.4652	13.6647	1.39982	346.103	14.1778	37.6146	11.24	8.45321	1.75897	3.0267	0.969553	299.933	2.01639	105	0.00587477
42.3716	女	72.1822	158.454	24.0026	1.00857	23.2716	135.752	75.1763	88.9287	18.8885	100.139	36.7093	11.7011	104.557	14.7569	31.9358	2.16482	5168.65	13.2122	31.4858	11.2	8.12338	2.08385	-0.130222	0.683527	314.269	14.2114	无	1.04676
65.8696	男	40.2371	158.454	27.0203	0.125531	1.23233	125.257	64.3446	79.8949	21.8329	97.8877	36.9303	3.71432	786.578	13.8017	18.6911	0.21707	495.786	13.1221	36.914	9	1.98921	3.71527	1.00268	8.88043	99.6969	3.12739	105	0.0020239
45.5094	男	81.7465	158.454	27.6231	0.0163053	7.00339	116.153	60.1058	76.444	16.4585	99.8065	36.6564	6.25959	257.168	9.76785	24.5355	1.04663	1011.08	14.9178	39.0495	13.7	4.23125	3.11806	5.05079	2.958	248.332	26.2102	85	0.951384
48.8012	女	62.4052	158.454	14.1956	0.953198	8.90042	117.373	60.3678	71.7033	22.2958	96.8573	36.5545	5.52696	447.535	15.056	16.0894	4.31539	-346.109	13.7417	27.7362	26.4	1.62978	5.12282	0.257685	3.11539	107.151	-1.07972	1072	1.06918
57.168	男	66.5772	154.869	29.959	-0.0044499	2.60541	92.9116	72.4578	78.5187	19.8625	97.5548	36.6859	2.72784	382.789	14.9532	23.5352	0.198724	367.735	14.1631	26.2363	1.5	6.8305	4.67516	3.79896	2.76992	187.428	1.95908	无	-0.0291436
48.7182	男	45.5484	158.454	31.0528	-0.0827966	2.45658	115.201	78.8929	83.0768	20.5783	92.0645	36.1573	4.96014	337.784	14.838	13.5137	-0.190183	1085.29	14.1211	34.4722	4.2	7.96913	2.30306	3.07391	0.824435	295.851	-0.384155	56	0.071932
72.9935	男	53.7408	158.454	28.5956	-0.00375702	3.13392	92.0812	48.7749	62.6463	27.931	98.914	36.9608	4.71324	333.053	14.1248	15.0833	8.12951	1089.65	16.3695	37.3269	11.9	5.34822	1.10043	3.22736	3.11656	62.3591	2.45308	296	1.06083
79.4298	男	82.9168	158.454	0.890168	0.961169	1.34262	65.3953	49.4233	53.1949	26.5449	96.8298	37.4314	15.219	2057.86	13.5025	35.2305	0.0652566	404.108	15.321	40.4457	5.2	-0.0118568	2.1466	4.11648	1.21431	86.6611	5.46357	240	0.0287645
44.8581	男	80.5731	158.454	28.5247	0.0426693	4.5706	131.532	66.6171	83.6144	23.5944	96.274	36.5567	6.88167	473.207	13.4781	16.5873	0.711952	4069.81	11.4553	28.3673	4.2	0.114765	1.85165	0.127853	2.85812	214.501	39.773	无	1.08568
75.7838	男	71.6177	158.058	28.8714	-0.0256159	1.09985	112.897	80.0966	89.2317	18.477	93.8913	36.6114	2.58898	413.682	13.4392	17.8294	3.10104	412.221	16.2095	23.7045	3.3	1.84966	4.1217	3.09021	2.69569	53.2279	0.908164	234	0.104574
60.464	男	61.0637	164.429	2.13522	0.994557	1.2859	138.675	129.086	135.386	20.8544	92.52	35.9311	12.1391	364.786	12.1683	26.419	0.751636	6393.75	11.7514	31.5809	3.3	1.12415	1.22026	1.19929	1.74962	106.133	-1.19892	无	0.991791
55.955	男	66.9847	157.174	29.7622	-0.0296254	2.29453	95.9829	71.6055	75.494	20.6593	97.6796	36.8386	2.54837	266.441	14.9481	24.7368	0.164267	-352.168	13.4901	24.8453	16.7	7.4277	4.98072	3.83308	3.17879	202.326	4.20828	279	-0.037888
66.1656	女	55.0139	164.906	28.2258	0.0810535	4.82566	111.996	85.962	97.2079	31.5698	100.103	36.7201	3.73621	341.492	15.0453	26.1558	2.43214	1400.8	16.77	48.4642	9.8	0.253862	3.39147	-0.212733	2.93906	209.298	2.8009	456	0.912668
67.1615	男	51.8081	153.06	4.8286	0.985026	3.94566	95.2285	42.7456	57.5274	20.1007	99.6032	37.1394	6.33632	303.179	14.8838	22.4522	1.61048	9.19458	19.3947	43.3819	1.3	4.97923	5.00862	3.99903	1.19836	167.304	-0.0179156	无	1.10515
70.6465	男	58.415	158.454	28.6537	0.0854214	6.78748	149.042	105.204	117.563	14.6491	94.8522	37.3332	10.5514	321.705	9.0343	24.5561	0.775369	1317.43	22.9412	41.9053	2.8	0.172252	3.22308	-0.331728	2.97159	65.038	37.9546	无	0.979403
47.0943	男	58.1496	158.454	28.4138	0.0379503	4.90877	125.806	91.956	102.546	28.8609	93.3225	37.2046	6.05624	1299.73	15.0442	27.4951	1.20265	889.481	11.4907	49.3728	16.7	3.14727	2.0573	0.188898	1.19793	44.0018	-0.0474027	无	0.0531708
76.8771	男	50.387	156.457	13.3635	1.02247	12.6343	100.105	81.8076	90.4186	23.193	85.616	37.0524	3.38116	258.913	13.8311	18.8792	2.28673	2289.55	16.9505	52.2344	14	2.12918	2.1145	0.187374	2.03638	317.561	0.443809	27	0.965276
52.4507	女	74.6578	158.454	27.3941	0.0171878	1.05115	177.711	85.1932	107.398	19.8821	95.083	36.8644	2.53343	746.34	11.7386	18.5411	1.20037	-170.414	10.9608	17.7606	1	2.28355	2.67318	0.933483	1.02083	74.1256	45.0948	无	0.0720601
41.6524	女	114.117	158.454	27.452	0.0183562	9.56545	109.07	50.3004	66.1496	14.8965	99.4109	36.6063	4.99925	1324.1	14.8691	23.4688	7.07065	-127.282	17.2191	39.8703	6.5	4.28164	2.07256	-0.0569115	2.97407	169.911	51.3666	23	-0.032797
40.3565	男	62.4291	158.454	9.14005	0.910145	3.43734	113.23	77.3456	85.488	16.2887	98.875	36.4349	7.82876	338.353	15.0683	24.6827	1.51283	1187.95	19.1193	24.5252	21.3	-0.0324258	4.85628	2.9889	6.66963	183.341	3.68523	1095	0.944174
54.901	男	78.9821	179.845	21.4014	0.987	8.25361	86.0646	62.9614	69.71	21.1193	99.0159	36.3896	6.6275	1896.98	14.1747	33.7061	21.7891	-62.0746	8.08031	42.1305	5.2	3.16368	5.83449	0.00798492	1.44238	158.639	12.0079	无	-0.00976749
61.9108	女	48.7673	158.454	28.7646	0.0393956	1.42849	134.63	83.7914	97.6632	17.3596	100.127	36.5596	5.57769	893.707	12.2489	13.1478	3.7268	511.086	13.4643	33.9348	10.4	-0.0976902	7.34105	3.01952	0.785091	1.53402	2.19447	无	-0.024911
41.6528	女	73.0479	158.454	23.4194	0.997721	22.3707	138.895	78.3728	86.451	19.5794	99.4746	36.7012	11.7266	124.286	14.8559	32.1635	2.70168	5048.74	12.444	29.895	0.8	7.76461	1.9582	0.085686	0.689568	316.429	17.3461	241	1.02793
65.9578	男	39.5048	158.454	29.6437	-0.0655005	1.80313	129.427	64.9064	79.9742	22.1124	98.5641	37.0631	4.1755	859.51	14.0828	20.0565	0.467708	-413.822	12.6973	38.1966	9.47	1.93128	3.80381	0.973503	8.95141	106.455	1.53804	无	-0.0024076
49.4777	男	77.4934	158.454	27.9945	-0.00244274	2.61687	140.432	86.5173	98.8852	17.106	97.7187	36.4762	9.23603	405.554	15.2807	16.0423	1.9888	1152.23	37.8223	180.333	4.2	3.98055	1.92977	0.144776	2.78054	174.065	3.74545	无	1.0294
49.5445	男	67.9383	158.454	28.6565	0.0794339	3.39679	126.741	61.0151	77.4419	10.9951	90.2108	34.9917	7.81179	491.912	3.33995	33.0704	-0.198454	844.23	14.1228	21.0984	9	6.57629	5.7457	0.0684509	2.9882	109.895	6.33814	无	0.986367
55.348	女	48.2392	158.454	-0.641653	1.05812	0.508853	80.2487	58.842	68.1548	24.7233	96.9486	36.305	8.5289	1436.08	13.9828	19.897	1.72297	650.112	16.9549	26.8533	4.7	8.21939	4.28039	0.906834	3.15699	196.231	16.5841	35	-0.031157
65.1529	男	73.2913	158.454	27.62	-0.00289021	3.74874	136.14	72.7511	89.4617	13.1164	95.0162	37.0299	8.99613	2019.17	6.93556	18.8433	0.436782	497.633	5.13482	57.1103	4.16	1.29432	5.86396	1.20493	1.22718	135.651	3.87161	108	-0.0273369
53.6239	女	41.3476	167.883	28.6828	0.0443501	7.10872	152.765	79.3045	97.6916	18.2542	93.0757	37.2373	5.94555	1205.97	15.0557	14.0364	0.656442	419.29	19.2307	36.5432	3.3	8.69229	5.1035	0.791514	1.18597	148.919	3.21155	无	0.0957952
74.0018	男	78.0691	160.022	28.8335	-0.0170841	3.50842	143.125	122.219	125.076	18.0665	97.642	37.2854	6.86273	1025.54	14.6647	24.9196	5.59171	424.647	13.3117	53.847	15.3	8.38298	4.26518	-0.014147	2.93024	131.727	16.5233	无	0.0105481
20.0975	男	57.3175	152.837	16.2614	0.920577	14.9561	98.5263	72.3249	79.5913	21.7121	95.8886	37.2337	7.13933	891.464	14.9435	19.8615	0.719893	2539.67	14.0503	34.9841	14	0.933442	1.9022	0.148417	1.01132	270.823	7.20715	无	0.907071
70.1034	男	56.3655	158.454	27.9297	-0.0430924	12.5822	137.764	120.757	123.827	17.8638	97.9436	36.7143	3.76352	409.534	13.2172	19.736	1.15902	720.958	15.7804	24.5667	14.4	7.0024	7.10404	2.88901	1.0931	57.7892	4.14343	238	0.975631
50.2738	男	77.0908	158.454	26.51	0.0728513	2.84882	144.424	89.4676	100.077	17.1369	97.48	36.4786	8.63712	587.396	15.1872	16.0966	1.30832	1474.1	37.699	183.464	2.9	4.07726	1.79857	0.0475153	2.59878	154.099	4.79263	无	1.00454
53.0732	男	99.1595	158.454	27.6495	-0.0127717	1.344	98.6714	82.3878	88.1352	26.6377	92.3867	37.546	3.03436	2797.93	11.9212	21.4586	2.03859	428.892	16.2438	26.5253	9	6.84976	3.47826	0.0834001	3.13024	59.3513	3.32504	31	0.0864478
56.6218	男	80.2154	158.454	28.874	-0.0113449	2.86802	95.7307	68.9198	73.4991	19.5876	94.0869	37.3845	4.12158	967.207	8.0635	20.6639	0.82085	323.468	16.6559	36.5655	9.47	0.0491184	2.18311	-0.132086	0.667365	144.974	18.752	无	0.0481894
72.9224	男	68.1117	158.454	1.65464	0.986024	0.629412	103.07	43.7447	58.1703	13.7339	98.802	36.8341	9.62935	1998.93	14.7595	21.2499	22.0405	417.425	15.5955	37.4075	26	4.96328	4.96234	-0.011125	3.46572	246.245	14.8048	296	-0.0431779
55.5362	女	64.8295	158.454	2.70147	1.08876	0.278102	112.895	51.77	66.1419	-0.273898	97.1023	36.8134	9.29235	437.489	14.2052	28.3755	7.15888	2161.61	16.1524	26.4985	4.5	5.97596	0.848875	-0.0240226	2.90767	112.951	29.0748	6	1.11329
35.9544	男	71.6618	158.454	28.0489	0.0757912	9.2489	157.888	79.9786	98.6102	10.5717	93.6808	36.9785	2.44229	586.211	13.9773	14.1292	0.529764	212.619	17.5158	17.1669	15.3	7.04627	0.977708	-0.0846892	2.9578	129.897	1.5873	32	-0.00145971
65.1135	男	69.4377	158.454	28.0069	0.103425	4.24998	152.736	57.9877	83.4743	16.8145	97.4214	36.3967	1.81789	409.732	13.9195	13.0958	2.07526	288.788	12.8591	34.8357	4.2	3.66505	1.93352	0.353296	2.82431	82.9289	7.01835	无	0.0583844
58.8756	女	69.7469	156.754	27.3518	-0.00741361	6.12739	128.274	71.3829	88.8027	30.4119	98.7213	36.7778	9.91873	236.196	7.8945	24.8898	2.76404	25737	13.6604	26.84	6.5	6.01009	2.38189	2.88287	0.856206	160.347	51.6127	85	0.945894
43.1788	女	46.2326	158.454	28.686	0.01378	3.45701	133.563	96.8301	101.523	18.4368	100.169	36.2852	2.79959	623.449	14.9817	18.0563	2.98907	-186.479	9.3114	30.9763	6.9	8.04168	4.76035	3.15425	1.51907	12.1277	17.2663	无	-0.112342
58.2051	女	64.8295	158.454	21.8222	0.327267	4.73453	121.772	70.207	83.3849	20.5149	96.0336	36.8044	6.4783	969.562	12.6909	21.6088	3.3531	1393	12.9791	42.6621	1.5	3.92194	3.95102	1.40255	3.08996	125.561	11.7338	无	0.326151
68.5118	女	70.633	158.454	28.483	0.0688447	3.52012	157.29	65.7885	82.2558	16.0905	97.2961	36.3831	2.5894	489.733	14.1919	14.663	1.33513	792.809	13.0585	34.6098	0.7	3.94496	1.99641	-0.166794	2.64639	86.3785	5.90562	无	-0.152262
74.6878	男	53.3248	158.454	27.4836	-0.054434	2.47707	58.7912	38.9933	46.7405	15.7	97.9989	36.322	14.732	1067.69	2.88471	47.1438	4.18742	805.433	12.9476	28.4308	4.58	8.29016	2.97704	0.0157815	3.34334	158.804	7.36891	57	1.09894
33.2826	男	71.6756	158.454	25.8862	0.0101046	3.24955	89.7632	33.7285	49.1364	24.8239	100.34	35.6115	9.769	1117.69	14.4646	23.7191	0.676126	251.624	12.0097	25.4283	2.8	-0.0901824	3.97876	0.0996328	1.27236	44.9926	-0.956663	648	0.0100498
81.5212	女	54.8489	158.454	8.337	0.948851	4.65726	160.937	129.053	139.973	23.895	85.743	37.0037	2.1377	548.304	13.4273	18.2139	0.581772	193.384	16.1147	15.4394	7.3	4.05797	5.9773	0.141294	2.93581	-0.773129	48.2062	456	-0.043315
46.9125	男	79.3003	166.496	27.53	-0.027449	1.46427	149.552	92.9079	106.01	13.8531	101.38	36.8691	4.029	905.091	8.73998	23.7577	1.50929	305.047	26.8185	46.5224	2.6	8.33081	3.17073	2.2398	5.07001	81.0767	0.210806	241	0.0212032
79.3335	男	54.4535	133.976	18.7431	0.960972	6.89917	58.9171	39.9235	48.0302	21.8237	91.5313	36.8415	10.15	2226.42	15.0203	21.2034	0.810318	470.924	13.0108	31.3556	6.5	1.97976	5.11909	3.45208	2.99659	174.636	0.338591	无	0.00886936
70.6238	女	68.0199	158.454	28.6807	-0.028335	0.734049	152.649	63.1714	90.9709	20.9318	94.5657	36.4435	9.79694	1794.58	6.81023	24.3758	15.492	378.822	20.9344	25.0275	10.1	2.05469	5.08192	3.03845	7.45025	24.2413	-0.632751	138	0.0290876
56.7037	男	42.4744	158.454	27.6152	-0.0251303	11.6446	133.648	57.9096	77.878	18.0182	99.7335	37.5751	3.68701	2176.23	14.9047	20.8265	9.61227	-33.7774	14.3027	42.7064	13	7.97542	6.40671	0.898218	9.81824	133.154	3.01098	41h	0.0566605
33.2597	男	56.3049	158.454	3.75047	0.974443	1.7721	130.773	52.0406	74.1922	14.328	97.1146	36.6944	5.64706	122.136	14.584	21.0298	3.40818	4902.87	13.2178	38.1579	5.2	4.31553	2.05862	0.0695141	1.03333	71.2199	32.8057	32	0.986419
79.893	男	80.3196	158.454	1.67568	1.03884	1.00729	71.1548	48.0924	56.669	27.2006	96.7784	37.3398	14.7622	1932.14	12.9103	33.6417	-0.294584	443.683	14.821	36.9532	3.2	-0.0657205	1.67624	3.95914	0.902274	84.6838	4.67529	无	-0.0412161
64.8506	男	39.5844	158.454	28.671	-0.0515012	1.88443	132.032	66.5157	80.9727	22.0895	98.2886	36.9346	4.01013	787.736	14.1051	19.276	-0.0369007	-189.318	13.2032	38.4555	9	2.32726	4.12639	1.14213	8.6729	90.7716	2.20702	276	0.0387772
37.5546	男	63.7997	158.454	8.87913	1.01028	2.36683	113.41	74.7471	86.2727	16.6211	98.5388	36.4755	7.45637	625.144	15.1579	25.4959	0.385937	1655.91	18.3467	19.1876	3.55	-0.0264152	5.28833	2.80089	7.50025	174.373	2.42096	600h	1.03759
64.227	男	65.5648	158.454	29.1897	0.056773	3.74658	126.145	88.786	102.164	21.7116	95.3488	36.3996	6.00704	923.841	14.7082	12.4119	0.665278	320.933	15.8487	30.4688	3.55	6.78084	5.81888	3.36353	4.7303	194.756	-0.00782212	43	0.00471897
61.3276	女	68.5465	158.454	2.25645	0.976078	2.08095	135.646	92.392	106.293	23.4782	99.1525	36.4286	2.53348	256.93	14.7506	16.6152	0.920673	808.735	14.3612	37.4015	0.7	1.17324	1.94881	3.1314	7.05025	106.832	0.730003	无	1.10201
76.743	男	70.1387	158.646	27.6375	-0.0334645	1.1375	107.735	81.4415	91.5949	18.1279	92.952	36.7137	3.04769	536.382	13.6483	17.9634	2.82322	274.742	15.9214	23.3134	41.1	1.92231	3.8828	2.74151	2.60268	51.2615	0.346567	35	-0.0205098
39.0492	男	63.2676	158.454	10.3608	0.989254	1.31397	117.383	77.3699	87.7379	15.5164	98.7558	36.3653	7.9078	489.824	14.7416	24.4268	1.44585	1869.98	18.4601	17.1214	2.8	0.158229	5.24159	2.89117	6.90891	171.734	1.28569	241	0.957846
80.0231	女	58.2576	152.341	26.2564	0.0549908	1.75868	92.3065	49.1501	59.2394	18.0343	99.8581	36.4042	4.80528	935.608	11.1688	24.6368	0.603843	1107.84	11.4853	28.5999	4.65	5.30399	1.01858	3.12526	10.0963	207.098	5.72977	无	0.0195855
63.2987	女	77.7656	158.454	4.64115	1.00905	0.692386	109.543	70.3227	82.7408	33.8531	64.7024	36.5975	8.28304	882.533	12.1588	24.6185	3.25873	1531.82	16.4067	41.2238	4.16	5.00133	2.33797	0.180563	0.811751	67.017	-1.99716	无	0.968383
47.8432	女	77.3778	158.454	26.9895	-0.0247616	1.53952	140.943	88.5977	98.1285	16.9753	98.586	36.5434	8.73986	287.089	15.5991	16.4218	1.69696	2212.56	38.1672	180.16	4.3	3.8828	2.08091	-0.195282	3.13394	170.725	5.43713	无	1.02321
39.6915	女	51.1392	152.958	26.6722	0.0225551	11.8146	122.154	80.3965	87.4868	21.061	98.5788	37.6144	11.5816	976.694	15.0431	26.1654	0.607254	4093.05	13.1086	28.5645	8	2.72887	5.04741	0.109446	2.93859	93.6047	0.85389	241	0.960978
49.8575	男	51.3732	155.938	15.3256	0.948619	16.0038	141.984	67.5378	81.7416	25.0331	86.8422	36.9752	9.60902	128.693	14.5869	15.148	0.338539	25774.4	22.9343	49.3482	8.91	2.85892	4.01334	3.70109	3.26479	92.8867	19.5144	无	0.981251
48.0576	男	80.5904	158.454	29.0923	0.0317604	6.25305	118.496	64.3246	76.5262	15.5043	99.1545	36.643	7.08088	247.706	9.81253	24.7194	-0.0229369	865.111	13.4263	33.3294	14	3.8537	3.15996	4.98629	3.31083	246.339	27.6921	无	1.08858
64.2593	男	68.1334	158.454	27.3823	0.0190465	3.69159	126.13	86.8399	99.861	21.8983	95.7329	36.5672	5.99637	897.625	14.8662	11.5649	0.974093	1530.08	16.151	27.4733	8.91	6.98776	5.6602	3.17069	4.86607	199.442	0.0803661	62	-0.0189998
33.1961	男	70.0703	158.454	29.5056	-0.014348	4.64228	84.296	39.0794	43.9142	24.1998	99.7173	35.6964	9.32466	1234.35	13.7032	25.2264	1.09162	-314.432	12.1869	25.4801	4.65	-0.348672	4.01669	-0.0846551	1.01751	55.6306	-0.257641	105	-0.0374222
89.616	男	50.3604	158.454	27.474	-0.0390892	2.359	99.7474	78.9779	85.3497	21.7285	85.6903	36.3181	10.3449	645.844	6.25088	35.366	4.30805	568.249	12.942	30.444	1.08	8.08065	1.9863	-0.231305	3.04187	192.427	24.3576	无	1.05484
70.7862	男	49.048	141.332	26.324	-0.0413311	2.97484	140.868	63.063	78.9335	20.8377	92.6711	36.6087	5.74611	338.954	15.2363	27.2465	0.589145	1171.23	12.1514	27.7835	17.99	4.34839	6.14185	4.02244	3.14137	107.484	3.05003	无	0.950764
37.8846	女	49.6578	150.71	26.904	0.0249296	12.8111	124.327	80.6924	89.2691	20.7387	97.692	37.5203	10.8341	789.587	14.663	27.0469	0.562125	3930.99	13.0676	27.3974	2.2	3.07164	4.9633	-0.0928215	3.00328	87.3824	-0.107211	31	0.967539
95.9084	男	64.8295	134.514	29.2131	0.0572868	1.11256	142.33	106.434	111.044	25.8491	96.8178	36.8694	1.58345	331.485	14.2115	18.1519	0.331588	636.653	23.7625	43.4251	0.71	7.20629	7.79688	0.0966342	1.04342	64.1249	2.72289	648	0.027009
44.2966	男	114.749	158.454	27.847	-0.029707	8.99304	106.748	46.6123	70.6358	14.3361	99.7005	36.5475	5.12886	1310.05	15.4453	23.7515	7.35538	-512.315	17.7259	36.3851	2.8	4.27912	2.00144	-0.135893	2.94444	164.818	48.6674	无	0.0439599
49.6523	男	47.9797	151.746	27.4618	0.0213669	3.58949	125.369	66.9382	85.4913	18.3985	100.098	36.6609	2.20999	743.587	14.5549	13.4106	0.200644	6.93461	10.258	32.2913	1	4.31531	2.78825	-0.118596	1.0263	152.57	5.53558	421	0.0571733
42.805	男	48.7626	158.454	28.1571	-0.0972831	2.71252	175.433	77.8764	96.7204	18.4142	96.1699	37.1641	4.57477	562.239	10.8356	13.1607	-0.288066	-15.0146	12.3588	43.9042	4.2	2.47689	2.62352	-0.310214	3.29626	146.303	9.78339	无	-0.0350036
70.4346	男	52.2625	158.454	28.4926	-0.0272509	14.1826	135.545	123.263	126.427	17.9637	97.5708	36.8416	3.85661	156.762	12.7369	17.429	1.31069	957.728	16.7539	24.5069	12	6.8727	7.14219	3.02609	1.14747	51.3511	0.742231	276	1.02792
58.2986	女	48.0312	158.454	1.34688	0.998552	-0.363121	90.2705	58.9337	67.8863	29.2307	92.5991	36.8817	1.57561	121.155	15.8237	17.8814	7.27008	9150.45	23.1407	43.3621	16.98	3.81678	2.11323	-0.0246981	1.16006	283.799	29.8019	无	0.978165
49.5631	男	46.5468	158.454	29.4219	-0.0424033	1.46124	116.788	83.2562	84.1418	20.3953	91.5381	36.1631	4.71687	819.299	14.8967	12.8675	0.644609	359.89	14.6908	37.8514	4.6	8.19979	2.09134	2.81759	1.16504	295.737	1.51345	无	-0.028372
53.8214	男	77.9308	179.336	20.6168	0.956346	8.02645	89.2223	58.3883	67.5454	22.3745	98.2375	36.3473	6.17357	1880.56	13.8272	34.1217	21.463	-659.204	8.78699	43.4254	10.2	3.18061	6.25478	0.0297472	0.964892	160.679	11.7648	无	0.0563645
45.6659	男	80.5064	158.454	26.6983	-0.0311274	3.26963	130.568	70.9708	81.7917	22.7979	95.1795	36.5631	6.76895	632.463	13.0954	16.4025	-0.138038	4439.92	11.7693	30.0964	16.2	0.197799	1.86995	0.15765	3.07277	178.256	40.9849	无	0.974256
55.7572	女	73.4227	166.01	27.5941	0.0136201	10.0015	121.415	85.5742	96.7519	22.3253	93.6147	36.6038	4.90524	839.941	13.8302	21.5212	2.79134	846.32	15.9103	32.486	13.7	2.48177	6.72015	0.966911	7.7523	180.233	2.90492	105	0.0130325
59.2841	男	54.6452	156.047	28.2555	-0.00873201	0.842401	142.541	101.49	114.773	32.7023	96.1514	36.4435	3.48739	350.107	10.1164	17.1485	1.24797	616.731	15.156	35.332	6.2	1.0029	1.98631	1.04116	3.28961	61.0751	44.0192	843	1.00729
60.944	男	80.2821	158.454	27.0539	-0.104331	4.60337	142.706	60.3055	81.8203	16.6866	98.8671	36.7095	11.0589	617.418	6.61499	26.0655	0.93911	794.05	14.2203	36.3928	3.9	5.10867	0.932047	0.041952	2.36478	189.886	4.98068	452	0.94984
48.0143	男	74.3932	158.454	27.0604	-0.0988527	2.08824	178.411	83.3426	111.517	19.6688	95.6563	36.8205	2.98605	664.947	11.9304	18.1972	0.975634	-196.342	10.8529	22.5458	1	1.75	2.83529	0.815141	0.980108	70.1728	48.551	无	0.0452567
71.0973	男	80.1252	158.454	28.3375	-0.028288	2.69146	73.687	52.7033	61.4387	15.5144	100.317	36.4751	11.7704	1181.99	6.37494	31.0596	1.47724	-136.177	15.9706	36.1154	4.55	6.54451	2.98439	4.31568	3.26041	126.787	5.66186	无	0.0262464
55.49	女	91.1225	179.3	27.9522	0.0213343	2.20017	90.9174	56.3848	66.8707	36.9002	91.2928	36.6639	1.94046	945.604	14.9834	16.8	2.24785	-303.21	30.1976	35.9827	4.16	7.91418	4.8804	2.92773	0.688691	90.6381	16.9262	无	-0.0930478
53.3555	女	98.375	164.969	28.0322	-0.12807	1.22784	116.85	52.8188	68.1585	26.4501	95.303	36.0812	5.05679	1736.1	13.0413	28.0794	2.96308	-58.8301	14.0403	30.5876	0.8	4.9214	2.64097	0.100711	3.09125	162.969	4.54066	无	0.0129958
77.2309	男	82.5336	158.454	27.2554	-0.023294	0.690832	134.254	54.2137	77.1315	20.0124	97.7882	36.5613	2.74331	423.149	14.1386	13.0614	2.90303	225.808	11.1269	19.1427	2.7	-0.0884222	4.91373	4.11807	2.84461	127.976	4.62536	43	-0.03621
63.9889	女	56.2858	158.454	1.08383	0.97547	0.970425	85.8628	43.6655	58.5864	17.722	91.6525	37.0588	5.53497	2597.66	13.3414	30.0493	14.3482	-224.808	14.9381	27.7532	21.9	2.83555	1.77779	-0.0214272	2.91582	122.82	5.60759	无	0.0513925
59.0662	女	68.0621	157.501	27.0927	0.0647149	2.1173	94.6208	72.2142	81.9481	19.1917	96.6068	36.7112	3.56876	369.169	14.5172	23.2384	-0.0637625	645.364	13.6519	25.0472	14.5	6.81399	5.0453	4.09314	3.21592	192.917	4.88564	18	-0.0677098
65.108	男	66.4464	158.454	28.8739	-0.0179471	4.44125	127.335	88.2836	100.417	21.2889	94.932	36.5407	5.80052	840.148	15.1705	10.6207	0.706089	1499.13	16.213	32.5105	10.1	6.86645	5.87171	3.03773	5.04521	211.447	-2.8231	105	-0.0166992
52.7975	女	77.8086	179.983	21.9862	1.01785	8.22637	88.9874	64.1381	71.1649	19.8361	98.8347	36.3665	5.96952	1915.97	13.9218	34.1932	21.4692	402.512	7.45594	42.7282	10.7	2.65172	6.21738	-0.217601	0.535649	161.648	11.2333	无	0.0169591
78.1265	男	46.0663	158.454	4.69772	1.00658	5.86731	86.6207	48.0012	57.4942	26.6262	87.8927	37.6261	3.31842	261.118	15.0486	23.2548	-0.150107	-44.2164	14.9526	27.2476	11.2	3.79974	4.31363	2.949	2.77713	141.62	9.08149	105	1.00255
75.7524	男	55.7182	158.454	4.48756	0.900687	2.16682	106.363	61.5943	68.7667	21.0864	92.3372	36.7798	2.11167	574.487	15.3091	15.9246	2.76363	686.284	12.5043	18.1235	4.2	8.49699	7.13285	2.90598	3.22262	91.9827	31.5754	无	0.0357408
58.5519	男	48.6167	158.454	26.531	0.0358086	6.09469	92.1288	73.6307	76.9569	24.055	98.3406	36.3131	2.60798	729.484	12.6517	19.0132	0.925267	-29.2184	5.93969	44.4912	4.5	7.18759	5.6967	0.929124	3.10247	192.611	15.8649	无	-0.0711305
80.7343	女	60.5978	151.87	27.3619	0.0100403	1.50389	89.5368	46.9641	58.7728	19.0798	99.2835	36.4679	5.1417	1016.88	11.7047	24.7773	0.865711	1242.27	11.1445	28.6034	14.5	6.23611	1.29434	2.79984	10.399	199.612	3.93637	843	0.077384
74.7775	男	81.5708	158.454	27.9181	0.0236921	1.90148	132.081	56.6327	76.0507	19.2459	97.2125	36.4564	2.77712	397.229	13.4355	13.461	2.13222	153.149	11.5498	20.7007	4.6	0.300191	5.30813	4.1729	3.38407	139.967	6.00858	无	0.0246004
59.0694	女	55.4675	158.454	20.477	1.18301	21.3985	136.343	88.3603	100.982	18.4292	100.474	36.7591	11.8303	6711.81	14.8398	21.5766	3.47587	1105.78	15.8564	36.9295	12	7.46771	8.00367	0.245898	7.92188	60.0878	0.404117	无	0.063696
